# Supplementary material for: Rapid, large-scale species discovery in hyperdiverse taxa using 1D MinION sequencing
Source: BMC Biol. 2019 Nov 29;17:96. doi: 10.1186/s12915-019-0706-9 (PMC6884855; doi:10.1186/s12915-019-0706-9)
Supplement: Supplementary file 4 — Additional file 4. Analyses of paralogs/contaminations. [file 12915_2019_706_MOESM4_ESM.xlsx]

## Sheet: Supplementary Table 3
Additional File 4: Analyses of paralogs/contaminations
Table 1: Pairs of clusters that have specimens sharing signals
Cluster pair	Number of specimens containing shared signals
Clust-UGC0002107_Clust-UGC0002177	12
Clust-UGC0002177_Clust-UGC0002107	8
Clust-UGC0002310_Clust-UGC0007917	3
Clust-UGC0002158_Clust-UGC0002126	3
Clust-UGC0002158_Clust-UGC0002106	3
Clust-UGC0002179_Clust-UGC0002216	2
Clust-UGC0002179_Clust-UGC0002283	2
Clust-UGC0002978_Clust-UGC0002122	2
Clust-UGC0002121_Clust-UGC0002122	2
Clust-UGC0006346_Clust-UGC0003776	2
Clust-UGC0005824_Clust-UGC0010028	2
Clust-UGC0002348_Clust-UGC0002122	2
Clust-UGC0002152_Clust-UGC0002122	2
Clust-UGC0002142_Clust-UGC0002122	2
Clust-UGC0002092_Clust-UGC0002164	2
Clust-UGC0002112_Clust-UGC0002164	2
Clust-UGC0002124_Clust-UGC0002122	2
Clust-UGC0002344_Clust-UGC0002094	2
Clust-UGC0002177_Clust-UGC0002122	2
Clust-UGC0002330_Clust-UGC0002092	2
Clust-UGC0002092_Clust-UGC0002106	2
Clust-UGC0002158_Clust-UGC0002132	2
Clust-UGC0002114_Clust-UGC0002147	2
Table 2: details of specimens analysed
SpecimenID	Illumina_clusterID (Lowest UGC code of 3% cluster)	Illumina barcode coverage	Nuniques	Multsignals (yes/no=1/0)	Incongruent cluster match	Congruent
UGC0012823	Clust-UGC0002091	559	1	0	0	0
UGC0010150	Clust-UGC0002091	9379	5	1	1	1
UGC0005906	Clust-UGC0002091	2098	1	0	0	0
UGC0002091	Clust-UGC0002091	2299	2	1	0	0
UGC0003592	Clust-UGC0002091	7899	3	1	0	1
UGC0005527	Clust-UGC0002091	79	1	0	0	0
UGC0002178	Clust-UGC0002091	1952	2	1	0	0
UGC0013332	Clust-UGC0002091	992	3	1	0	0
UGC0006106	Clust-UGC0002091	2764	2	1	0	0
UGC0007560	Clust-UGC0002091	3623	3	1	0	1
UGC0009662	Clust-UGC0002091	1940	3	1	0	1
UGC0002284	Clust-UGC0002091	1836	1	0	0	0
UGC0011413	Clust-UGC0002091	5408	4	1	0	1
UGC0011813	Clust-UGC0002091	1790	1	0	0	0
UGC0006138	Clust-UGC0002091	2122	1	0	0	0
UGC0008374	Clust-UGC0002091	727	1	0	0	0
UGC0012152	Clust-UGC0002092	3206	2	1	0	1
UGC0006314	Clust-UGC0002092	2442	2	1	0	1
UGC0004811	Clust-UGC0002092	13113	75	1	0	1
UGC0005915	Clust-UGC0002092	2706	4	1	0	1
UGC0010998	Clust-UGC0002092	1442	3	1	0	0
UGC0009005	Clust-UGC0002092	5101	5	1	1	1
UGC0011150	Clust-UGC0002092	226	1	0	0	0
UGC0005951	Clust-UGC0002092	1398	1	0	0	0
UGC0011905	Clust-UGC0002092	9079	17	1	0	1
UGC0007064	Clust-UGC0002092	2776	2	1	1	0
UGC0006076	Clust-UGC0002092	829	1	0	0	0
UGC0007653	Clust-UGC0002092	5747	8	1	0	1
UGC0012808	Clust-UGC0002092	1833	2	1	0	1
UGC0009545	Clust-UGC0002092	4305	4	1	0	1
UGC0013248	Clust-UGC0002092	605	1	0	0	0
UGC0012864	Clust-UGC0002092	115	1	0	0	0
UGC0012027	Clust-UGC0002092	734	1	0	0	0
UGC0011883	Clust-UGC0002092	947	2	1	0	1
UGC0006033	Clust-UGC0002092	2554	1	0	0	0
UGC0012842	Clust-UGC0002092	6997	12	1	1	1
UGC0012843	Clust-UGC0002092	2730	2	1	0	0
UGC0009002	Clust-UGC0002092	6309	15	1	1	1
UGC0012670	Clust-UGC0002092	4280	4	1	1	1
UGC0006757	Clust-UGC0002092	4403	3	1	0	0
UGC0005588	Clust-UGC0002092	2867	3	1	0	1
UGC0007981	Clust-UGC0002092	1431	1	0	0	0
UGC0010805	Clust-UGC0002092	2219	5	1	0	0
UGC0011989	Clust-UGC0002092	4665	2	1	0	0
UGC0007427	Clust-UGC0002092	910	1	0	0	0
UGC0002092	Clust-UGC0002092	84	1	0	0	0
UGC0012570	Clust-UGC0002092	2113	3	1	0	1
UGC0009204	Clust-UGC0002092	4157	3	1	0	1
UGC0007486	Clust-UGC0002092	1929	2	1	0	0
UGC0011826	Clust-UGC0002092	3115	2	1	0	1
UGC0008041	Clust-UGC0002092	813	1	0	0	0
UGC0008955	Clust-UGC0002092	4672	4	1	0	1
UGC0008951	Clust-UGC0002092	2429	2	1	0	0
UGC0012926	Clust-UGC0002092	1971	3	1	0	1
UGC0012925	Clust-UGC0002092	3998	2	1	0	0
UGC0007527	Clust-UGC0002092	4136	1	0	0	0
UGC0009626	Clust-UGC0002092	1812	1	0	0	0
UGC0006468	Clust-UGC0002092	1416	1	0	0	0
UGC0005848	Clust-UGC0002092	3087	3	1	0	1
UGC0005844	Clust-UGC0002092	310	1	0	0	0
UGC0005843	Clust-UGC0002092	7351	11	1	0	1
UGC0007304	Clust-UGC0002092	877	1	0	0	0
UGC0009361	Clust-UGC0002092	2100	3	1	0	0
UGC0009366	Clust-UGC0002092	5991	7	1	0	1
UGC0008994	Clust-UGC0002092	1528	3	1	0	0
UGC0006040	Clust-UGC0002092	2270	1	0	0	0
UGC0009345	Clust-UGC0002092	4790	6	1	1	1
UGC0007561	Clust-UGC0002092	4789	5	1	0	1
UGC0005800	Clust-UGC0002092	7176	6	1	0	1
UGC0005805	Clust-UGC0002092	4975	6	1	0	1
UGC0011187	Clust-UGC0002092	3615	5	1	0	1
UGC0006148	Clust-UGC0002092	1746	2	1	0	1
UGC0005669	Clust-UGC0002092	1917	1	0	0	0
UGC0005793	Clust-UGC0002092	3810	1	0	0	0
UGC0005799	Clust-UGC0002092	1238	1	0	0	0
UGC0009688	Clust-UGC0002092	1238	1	0	0	0
UGC0005961	Clust-UGC0002092	4707	3	1	0	1
UGC0009301	Clust-UGC0002092	2575	1	0	0	0
UGC0009519	Clust-UGC0002092	1368	2	1	0	0
UGC0009132	Clust-UGC0002092	384	1	0	0	0
UGC0009186	Clust-UGC0002092	6708	7	1	0	1
UGC0005986	Clust-UGC0002092	5581	6	1	0	1
UGC0012358	Clust-UGC0002092	2044	3	1	0	0
UGC0007971	Clust-UGC0002092	574	1	0	0	0
UGC0010986	Clust-UGC0002092	1551	4	1	0	0
UGC0011124	Clust-UGC0002092	343	1	0	0	0
UGC0011122	Clust-UGC0002092	741	1	0	0	0
UGC0008280	Clust-UGC0002092	749	1	0	0	0
UGC0006130	Clust-UGC0002092	1457	1	0	0	0
UGC0013218	Clust-UGC0002092	245	1	0	0	0
UGC0007623	Clust-UGC0002092	4321	3	1	0	0
UGC0006499	Clust-UGC0002092	1137	1	0	0	0
UGC0006728	Clust-UGC0002092	347	1	0	0	0
UGC0011897	Clust-UGC0002092	1774	1	0	0	0
UGC0012128	Clust-UGC0002092	2806	4	1	0	1
UGC0011004	Clust-UGC0002092	1979	1	0	0	0
UGC0009039	Clust-UGC0002092	2176	2	1	0	0
UGC0007035	Clust-UGC0002092	3007	3	1	0	0
UGC0006345	Clust-UGC0002092	6797	7	1	0	1
UGC0013252	Clust-UGC0002092	1449	2	1	1	0
UGC0006024	Clust-UGC0002092	396	1	0	0	0
UGC0005979	Clust-UGC0002092	1598	1	0	0	0
UGC0007419	Clust-UGC0002092	4987	3	1	0	1
UGC0004997	Clust-UGC0002092	6634	13	1	0	1
UGC0005921	Clust-UGC0002092	4827	4	1	0	1
UGC0006963	Clust-UGC0002092	472	1	0	0	0
UGC0006629	Clust-UGC0002092	1575	2	1	0	0
UGC0006789	Clust-UGC0002092	7216	10	1	0	1
UGC0007151	Clust-UGC0002092	3453	3	1	0	1
UGC0009486	Clust-UGC0002092	2414	3	1	0	0
UGC0010838	Clust-UGC0002092	332	1	0	0	0
UGC0008019	Clust-UGC0002092	245	1	0	0	0
UGC0005768	Clust-UGC0002092	3752	4	1	0	1
UGC0012395	Clust-UGC0002092	10998	46	1	0	1
UGC0011497	Clust-UGC0002092	14403	93	1	0	1
UGC0010791	Clust-UGC0002092	499	1	0	0	0
UGC0006080	Clust-UGC0002092	2439	2	1	0	1
UGC0010855	Clust-UGC0002092	945	2	1	0	0
UGC0012566	Clust-UGC0002092	3512	4	1	0	1
UGC0013087	Clust-UGC0002092	8596	26	1	0	1
UGC0007479	Clust-UGC0002092	3260	5	1	0	1
UGC0008675	Clust-UGC0002092	161	1	0	0	0
UGC0009092	Clust-UGC0002092	1414	2	1	0	1
UGC0013327	Clust-UGC0002092	207	1	0	0	0
UGC0012748	Clust-UGC0002092	2761	2	1	0	1
UGC0006478	Clust-UGC0002092	1367	1	0	0	0
UGC0007703	Clust-UGC0002092	3303	6	1	0	1
UGC0008397	Clust-UGC0002092	1399	1	0	0	0
UGC0006140	Clust-UGC0002092	1005	1	0	0	0
UGC0009373	Clust-UGC0002092	3340	3	1	0	0
UGC0006398	Clust-UGC0002092	6208	8	1	1	1
UGC0012016	Clust-UGC0002092	2558	2	1	0	1
UGC0005857	Clust-UGC0002092	4597	5	1	0	1
UGC0002128	Clust-UGC0002092	7760	13	1	0	1
UGC0006118	Clust-UGC0002092	2884	1	0	0	0
UGC0005836	Clust-UGC0002092	6075	5	1	0	1
UGC0007969	Clust-UGC0002092	176	1	0	0	0
UGC0005367	Clust-UGC0002092	6678	10	1	0	1
UGC0012440	Clust-UGC0002092	2115	1	0	0	0
UGC0012443	Clust-UGC0002092	4989	5	1	0	1
UGC0008238	Clust-UGC0002092	1479	1	0	0	0
UGC0005811	Clust-UGC0002092	3708	1	0	0	0
UGC0011191	Clust-UGC0002092	1702	2	1	0	0
UGC0006372	Clust-UGC0002092	5926	7	1	0	1
UGC0011943	Clust-UGC0002092	11282	38	1	0	1
UGC0002093	Clust-UGC0002093	2451	1	0	0	0
UGC0009731	Clust-UGC0002094	3346	2	1	0	1
UGC0004818	Clust-UGC0002094	6544	6	1	0	1
UGC0011155	Clust-UGC0002094	1041	3	1	1	0
UGC0004743	Clust-UGC0002094	284	1	0	0	0
UGC0006580	Clust-UGC0002094	2384	3	1	0	1
UGC0012734	Clust-UGC0002094	1867	1	0	0	0
UGC0002094	Clust-UGC0002094	2709	2	1	0	0
UGC0006797	Clust-UGC0002094	4752	2	1	0	1
UGC0012578	Clust-UGC0002094	8028	23	1	0	1
UGC0004612	Clust-UGC0002094	6894	14	1	0	1
UGC0012907	Clust-UGC0002094	14542	107	1	0	1
UGC0009145	Clust-UGC0002094	4278	3	1	0	1
UGC0006386	Clust-UGC0002094	8000	24	1	0	1
UGC0009649	Clust-UGC0002094	420	1	0	0	0
UGC0006000	Clust-UGC0002094	1356	1	0	0	0
UGC0010214	Clust-UGC0002094	517	2	1	0	1
UGC0005929	Clust-UGC0002094	5257	8	1	0	1
UGC0004600	Clust-UGC0002094	3888	1	0	0	0
UGC0009237	Clust-UGC0002094	208	1	0	0	0
UGC0004682	Clust-UGC0002094	19319	165	1	0	1
UGC0007228	Clust-UGC0002094	6661	6	1	0	1
UGC0011194	Clust-UGC0002094	1027	1	0	0	0
UGC0002095	Clust-UGC0002095	3314	6	1	0	1
UGC0003286	Clust-UGC0002095	9167	26	1	0	1
UGC0002096	Clust-UGC0002096	1289	3	1	0	0
UGC0002524	Clust-UGC0002096	11377	68	1	0	1
UGC0003031	Clust-UGC0002096	3149	1	0	0	0
UGC0008274	Clust-UGC0002097	147	1	0	0	0
UGC0006991	Clust-UGC0002097	4388	1	0	0	0
UGC0004121	Clust-UGC0002097	144	1	0	0	0
UGC0005677	Clust-UGC0002097	321	1	0	0	0
UGC0005615	Clust-UGC0002097	408	1	0	0	0
UGC0003519	Clust-UGC0002097	3975	1	0	0	0
UGC0002097	Clust-UGC0002097	2602	4	1	0	1
UGC0003571	Clust-UGC0002097	8575	4	1	0	1
UGC0007717	Clust-UGC0002097	4819	1	0	0	0
UGC0012259	Clust-UGC0002097	166	1	0	0	0
UGC0003284	Clust-UGC0002097	2534	4	1	0	1
UGC0006571	Clust-UGC0002097	1110	1	0	0	0
UGC0007669	Clust-UGC0002097	4068	3	1	0	1
UGC0005015	Clust-UGC0002097	10396	14	1	0	1
UGC0007255	Clust-UGC0002097	3594	1	0	0	0
UGC0006061	Clust-UGC0002097	662	1	0	0	0
UGC0005411	Clust-UGC0002097	3053	1	0	0	0
UGC0008568	Clust-UGC0002097	1689	3	1	0	1
UGC0011830	Clust-UGC0002097	2057	1	0	0	0
UGC0006038	Clust-UGC0002097	2797	2	1	0	1
UGC0008296	Clust-UGC0002098	665	1	0	0	0
UGC0012618	Clust-UGC0002098	1812	2	1	0	0
UGC0008555	Clust-UGC0002098	1923	2	1	0	0
UGC0007980	Clust-UGC0002098	552	1	0	0	0
UGC0002098	Clust-UGC0002098	524	1	0	0	0
UGC0010528	Clust-UGC0002098	501	1	0	0	0
UGC0003366	Clust-UGC0002098	4339	3	1	1	0
UGC0008046	Clust-UGC0002098	417	1	0	0	0
UGC0013317	Clust-UGC0002098	4932	4	1	0	0
UGC0008321	Clust-UGC0002098	598	2	1	0	0
UGC0011912	Clust-UGC0002098	2439	3	1	0	0
UGC0012890	Clust-UGC0002098	4068	7	1	1	0
UGC0011805	Clust-UGC0002098	5739	4	1	0	0
UGC0008924	Clust-UGC0002098	77	1	0	0	0
UGC0007556	Clust-UGC0002098	6544	5	1	0	0
UGC0002109	Clust-UGC0002098	3155	4	1	0	0
UGC0009583	Clust-UGC0002098	90	1	0	0	0
UGC0011567	Clust-UGC0002099	4253	2	1	0	1
UGC0011562	Clust-UGC0002099	1879	2	1	0	1
UGC0004164	Clust-UGC0002099	3360	4	1	0	1
UGC0004160	Clust-UGC0002099	3635	4	1	0	1
UGC0007927	Clust-UGC0002099	6367	20	1	0	1
UGC0008314	Clust-UGC0002099	394	2	1	0	1
UGC0008318	Clust-UGC0002099	1041	1	0	0	0
UGC0009191	Clust-UGC0002099	3004	1	0	0	0
UGC0005375	Clust-UGC0002099	4806	7	1	0	1
UGC0006312	Clust-UGC0002099	3255	2	1	0	1
UGC0011921	Clust-UGC0002099	4105	1	0	0	0
UGC0011547	Clust-UGC0002099	1862	1	0	0	0
UGC0004101	Clust-UGC0002099	373	1	0	0	0
UGC0005916	Clust-UGC0002099	1743	1	0	0	0
UGC0006053	Clust-UGC0002099	2592	1	0	0	0
UGC0007900	Clust-UGC0002099	8029	40	1	0	1
UGC0010287	Clust-UGC0002099	2988	1	0	0	0
UGC0004598	Clust-UGC0002099	4221	2	1	1	0
UGC0007240	Clust-UGC0002099	5094	5	1	0	1
UGC0007244	Clust-UGC0002099	6695	9	1	0	1
UGC0004125	Clust-UGC0002099	1114	1	0	0	0
UGC0012110	Clust-UGC0002099	1893	1	0	0	0
UGC0012806	Clust-UGC0002099	2435	1	0	0	0
UGC0012801	Clust-UGC0002099	499	1	0	0	0
UGC0009774	Clust-UGC0002099	3489	3	1	0	1
UGC0013203	Clust-UGC0002099	1804	1	0	0	0
UGC0013202	Clust-UGC0002099	488	1	0	0	0
UGC0012792	Clust-UGC0002099	498	1	0	0	0
UGC0008881	Clust-UGC0002099	4294	4	1	0	1
UGC0013015	Clust-UGC0002099	7491	16	1	0	1
UGC0011654	Clust-UGC0002099	6622	11	1	0	1
UGC0005901	Clust-UGC0002099	4794	2	1	0	1
UGC0005903	Clust-UGC0002099	5457	6	1	0	1
UGC0006034	Clust-UGC0002099	1937	1	0	0	0
UGC0013076	Clust-UGC0002099	3936	2	1	0	0
UGC0003725	Clust-UGC0002099	326	1	0	0	0
UGC0006581	Clust-UGC0002099	4496	4	1	0	1
UGC0010807	Clust-UGC0002099	1816	5	1	0	0
UGC0009249	Clust-UGC0002099	9032	35	1	0	1
UGC0009069	Clust-UGC0002099	2433	1	0	0	0
UGC0008682	Clust-UGC0002099	864	1	0	0	0
UGC0007426	Clust-UGC0002099	2519	2	1	0	0
UGC0010560	Clust-UGC0002099	3825	1	0	0	0
UGC0013263	Clust-UGC0002099	2289	1	0	0	0
UGC0007266	Clust-UGC0002099	8783	46	1	0	1
UGC0007161	Clust-UGC0002099	4611	9	1	0	1
UGC0011424	Clust-UGC0002099	7105	14	1	0	1
UGC0009266	Clust-UGC0002099	1941	2	1	1	0
UGC0004537	Clust-UGC0002099	9858	35	1	0	1
UGC0008522	Clust-UGC0002099	1949	1	0	0	0
UGC0002099	Clust-UGC0002099	5822	3	1	0	1
UGC0006638	Clust-UGC0002099	1116	1	0	0	0
UGC0013091	Clust-UGC0002099	4251	3	1	0	1
UGC0006405	Clust-UGC0002099	6874	11	1	0	1
UGC0009998	Clust-UGC0002099	1239	1	0	0	0
UGC0006326	Clust-UGC0002099	5362	4	1	0	1
UGC0011020	Clust-UGC0002099	7630	16	1	0	1
UGC0004577	Clust-UGC0002099	9472	30	1	0	1
UGC0008669	Clust-UGC0002099	189	1	0	0	0
UGC0008661	Clust-UGC0002099	2157	1	0	0	0
UGC0006427	Clust-UGC0002099	328	1	0	0	0
UGC0003360	Clust-UGC0002099	6628	11	1	0	1
UGC0006502	Clust-UGC0002099	478	1	0	0	0
UGC0002195	Clust-UGC0002099	2141	3	1	0	1
UGC0013352	Clust-UGC0002099	2434	3	1	0	0
UGC0006850	Clust-UGC0002099	1311	1	0	0	0
UGC0008386	Clust-UGC0002099	2598	2	1	0	0
UGC0004651	Clust-UGC0002099	8677	19	1	0	1
UGC0009594	Clust-UGC0002099	1505	1	0	0	0
UGC0010928	Clust-UGC0002099	156	1	0	0	0
UGC0012930	Clust-UGC0002099	7668	28	1	0	1
UGC0007756	Clust-UGC0002099	5466	5	1	0	1
UGC0012186	Clust-UGC0002099	4922	5	1	0	1
UGC0012182	Clust-UGC0002099	4397	5	1	0	1
UGC0012980	Clust-UGC0002099	1536	1	0	0	0
UGC0006360	Clust-UGC0002099	4636	1	0	0	0
UGC0007937	Clust-UGC0002099	1686	1	0	0	0
UGC0008797	Clust-UGC0002099	2062	1	0	0	0
UGC0008302	Clust-UGC0002099	1555	1	0	0	0
UGC0008879	Clust-UGC0002099	5148	4	1	0	1
UGC0012948	Clust-UGC0002099	2744	1	0	0	0
UGC0002328	Clust-UGC0002099	1334	2	1	1	0
UGC0006531	Clust-UGC0002099	1160	1	0	0	0
UGC0007663	Clust-UGC0002099	5280	6	1	0	1
UGC0005989	Clust-UGC0002099	7174	14	1	0	1
UGC0007053	Clust-UGC0002099	1749	1	0	0	0
UGC0013105	Clust-UGC0002099	1486	1	0	0	0
UGC0004497	Clust-UGC0002099	6084	8	1	0	1
UGC0006440	Clust-UGC0002099	2632	2	1	0	1
UGC0007646	Clust-UGC0002099	8338	29	1	0	1
UGC0012626	Clust-UGC0002099	6966	19	1	0	1
UGC0012629	Clust-UGC0002099	1518	2	1	0	0
UGC0004139	Clust-UGC0002099	1179	1	0	0	0
UGC0003014	Clust-UGC0002099	3532	2	1	0	1
UGC0006069	Clust-UGC0002099	2008	1	0	0	0
UGC0010273	Clust-UGC0002099	3587	1	0	0	0
UGC0012815	Clust-UGC0002099	651	1	0	0	0
UGC0008895	Clust-UGC0002099	3398	1	0	0	0
UGC0008890	Clust-UGC0002099	3266	2	1	0	0
UGC0004732	Clust-UGC0002099	1968	1	0	0	0
UGC0013233	Clust-UGC0002099	3435	2	1	0	1
UGC0013239	Clust-UGC0002099	1106	2	1	0	0
UGC0002130	Clust-UGC0002099	6232	4	1	0	1
UGC0011895	Clust-UGC0002099	5017	2	1	0	1
UGC0006003	Clust-UGC0002099	3307	1	0	0	0
UGC0011784	Clust-UGC0002099	2096	2	1	0	0
UGC0013006	Clust-UGC0002099	3509	2	1	1	0
UGC0006746	Clust-UGC0002099	7379	24	1	0	1
UGC0007295	Clust-UGC0002099	6232	10	1	0	1
UGC0008172	Clust-UGC0002099	1712	1	0	0	0
UGC0004482	Clust-UGC0002099	7823	20	1	0	1
UGC0004713	Clust-UGC0002099	14977	113	1	0	1
UGC0006646	Clust-UGC0002099	2282	2	1	0	1
UGC0003314	Clust-UGC0002099	4713	4	1	0	1
UGC0010816	Clust-UGC0002099	1151	4	1	0	0
UGC0010213	Clust-UGC0002099	531	2	1	1	0
UGC0004523	Clust-UGC0002099	8287	17	1	0	1
UGC0013047	Clust-UGC0002099	11118	64	1	1	1
UGC0009442	Clust-UGC0002099	851	1	0	0	0
UGC0011016	Clust-UGC0002099	5129	6	1	0	1
UGC0010496	Clust-UGC0002099	257	1	0	0	0
UGC0009270	Clust-UGC0002099	4202	4	1	0	1
UGC0008901	Clust-UGC0002099	2649	1	0	0	0
UGC0008907	Clust-UGC0002099	6236	7	1	0	1
UGC0009050	Clust-UGC0002099	3639	1	0	0	0
UGC0006419	Clust-UGC0002099	2992	2	1	0	1
UGC0012397	Clust-UGC0002099	779	1	0	0	0
UGC0004483	Clust-UGC0002099	3579	2	1	0	1
UGC0007132	Clust-UGC0002099	336	1	0	0	0
UGC0004565	Clust-UGC0002099	5265	3	1	0	1
UGC0003537	Clust-UGC0002099	6605	12	1	0	1
UGC0003535	Clust-UGC0002099	9760	33	1	0	1
UGC0002513	Clust-UGC0002099	3119	1	0	0	0
UGC0012939	Clust-UGC0002099	6183	13	1	0	1
UGC0004620	Clust-UGC0002099	5140	9	1	0	1
UGC0002163	Clust-UGC0002099	3814	3	1	0	1
UGC0002168	Clust-UGC0002099	4769	5	1	0	1
UGC0012308	Clust-UGC0002099	1618	2	1	0	1
UGC0006666	Clust-UGC0002099	4402	2	1	0	0
UGC0008422	Clust-UGC0002099	1520	1	0	0	0
UGC0005871	Clust-UGC0002099	1050	1	0	0	0
UGC0007700	Clust-UGC0002099	4352	1	0	0	0
UGC0007708	Clust-UGC0002099	6565	4	1	0	1
UGC0005775	Clust-UGC0002099	5502	5	1	0	1
UGC0012260	Clust-UGC0002099	411	1	0	0	0
UGC0004649	Clust-UGC0002099	9580	36	1	0	1
UGC0009111	Clust-UGC0002099	2054	1	0	0	0
UGC0008180	Clust-UGC0002099	1247	3	1	0	1
UGC0007233	Clust-UGC0002099	8384	24	1	0	1
UGC0010912	Clust-UGC0002099	1651	1	0	0	0
UGC0004706	Clust-UGC0002099	9696	57	1	0	1
UGC0004660	Clust-UGC0002099	2892	2	1	0	1
UGC0010974	Clust-UGC0002099	2213	1	0	0	0
UGC0004468	Clust-UGC0002099	4845	7	1	0	1
UGC0002100	Clust-UGC0002099	4336	4	1	0	1
UGC0006823	Clust-UGC0002099	4614	3	1	0	1
UGC0004687	Clust-UGC0002099	6666	19	1	0	1
UGC0004688	Clust-UGC0002099	14490	107	1	0	1
UGC0012056	Clust-UGC0002099	1869	1	0	0	0
UGC0008250	Clust-UGC0002099	536	1	0	0	0
UGC0008336	Clust-UGC0002099	1606	1	0	0	0
UGC0008333	Clust-UGC0002099	1876	1	0	0	0
UGC0004631	Clust-UGC0002099	8051	24	1	0	1
UGC0006529	Clust-UGC0002101	4564	13	1	0	1
UGC0012119	Clust-UGC0002101	9398	41	1	0	1
UGC0012795	Clust-UGC0002101	1109	1	0	0	0
UGC0007901	Clust-UGC0002101	4908	7	1	0	1
UGC0013356	Clust-UGC0002101	1647	3	1	0	1
UGC0005880	Clust-UGC0002101	3262	4	1	1	1
UGC0011417	Clust-UGC0002101	4881	9	1	0	1
UGC0008693	Clust-UGC0002101	3526	8	1	0	1
UGC0012559	Clust-UGC0002101	6451	29	1	0	1
UGC0007787	Clust-UGC0002101	6733	33	1	0	1
UGC0002101	Clust-UGC0002101	663	1	0	0	0
UGC0007453	Clust-UGC0002101	7645	32	1	0	1
UGC0008351	Clust-UGC0002101	2386	7	1	0	1
UGC0010165	Clust-UGC0002102	4797	3	1	1	1
UGC0005654	Clust-UGC0002102	1411	1	0	0	0
UGC0005090	Clust-UGC0002102	2514	2	1	0	1
UGC0005380	Clust-UGC0002102	164	1	0	0	0
UGC0007167	Clust-UGC0002102	6531	1	0	0	0
UGC0010488	Clust-UGC0002102	4305	3	1	0	1
UGC0004616	Clust-UGC0002102	9917	1	0	0	0
UGC0003566	Clust-UGC0002102	7413	2	1	0	0
UGC0004693	Clust-UGC0002102	8249	3	1	0	1
UGC0010478	Clust-UGC0002102	4942	1	0	0	0
UGC0004710	Clust-UGC0002102	5728	1	0	0	0
UGC0010537	Clust-UGC0002102	2153	1	0	0	0
UGC0009754	Clust-UGC0002102	2901	1	0	0	0
UGC0010122	Clust-UGC0002102	3792	3	1	0	1
UGC0002102	Clust-UGC0002102	5486	5	1	0	1
UGC0004594	Clust-UGC0002104	3562	4	1	1	1
UGC0006758	Clust-UGC0002104	5332	7	1	0	1
UGC0012866	Clust-UGC0002104	8231	35	1	0	1
UGC0011880	Clust-UGC0002104	1446	3	1	0	1
UGC0010011	Clust-UGC0002104	512	3	1	0	0
UGC0012909	Clust-UGC0002104	847	2	1	0	0
UGC0008433	Clust-UGC0002104	145	1	0	0	0
UGC0009715	Clust-UGC0002104	2074	3	1	0	0
UGC0007771	Clust-UGC0002104	2986	4	1	0	0
UGC0012237	Clust-UGC0002104	6055	14	1	0	1
UGC0003007	Clust-UGC0002104	758	1	0	0	0
UGC0013392	Clust-UGC0002104	3501	1	0	0	0
UGC0013390	Clust-UGC0002104	1739	2	1	0	0
UGC0008288	Clust-UGC0002104	1927	2	1	0	0
UGC0012838	Clust-UGC0002104	7645	32	1	0	1
UGC0007999	Clust-UGC0002104	111	1	0	0	0
UGC0006908	Clust-UGC0002104	1440	1	0	0	0
UGC0008036	Clust-UGC0002104	256	1	0	0	0
UGC0008039	Clust-UGC0002104	4417	4	1	0	1
UGC0002104	Clust-UGC0002104	1512	2	1	0	0
UGC0008819	Clust-UGC0002104	2593	2	1	0	0
UGC0008391	Clust-UGC0002104	505	2	1	1	0
UGC0006569	Clust-UGC0002104	3567	1	0	0	0
UGC0012829	Clust-UGC0002105	6330	3	1	0	1
UGC0005935	Clust-UGC0002105	3923	3	1	0	1
UGC0002947	Clust-UGC0002105	2224	1	0	0	0
UGC0010456	Clust-UGC0002105	4974	2	1	1	0
UGC0006430	Clust-UGC0002105	4011	1	0	0	0
UGC0002105	Clust-UGC0002105	12785	25	1	0	1
UGC0013177	Clust-UGC0002106	127	1	0	0	0
UGC0012558	Clust-UGC0002106	7883	24	1	0	1
UGC0002146	Clust-UGC0002106	13316	73	1	0	1
UGC0003264	Clust-UGC0002106	3528	2	1	0	1
UGC0013123	Clust-UGC0002106	4832	5	1	0	1
UGC0013187	Clust-UGC0002106	13794	88	1	0	1
UGC0010250	Clust-UGC0002106	4138	7	1	1	0
UGC0002106	Clust-UGC0002106	14824	87	1	0	1
UGC0003270	Clust-UGC0002106	6745	17	1	0	1
UGC0012564	Clust-UGC0002106	8536	38	1	0	1
UGC0012916	Clust-UGC0002106	4641	6	1	0	1
UGC0002181	Clust-UGC0002106	12191	69	1	0	1
UGC0002160	Clust-UGC0002106	13324	81	1	0	1
UGC0013322	Clust-UGC0002106	4950	13	1	0	1
UGC0002143	Clust-UGC0002106	12127	60	1	0	1
UGC0003245	Clust-UGC0002106	7993	27	1	0	1
UGC0002123	Clust-UGC0002106	2257	3	1	0	1
UGC0013113	Clust-UGC0002106	5883	11	1	0	1
UGC0013139	Clust-UGC0002106	1176	1	0	0	0
UGC0011560	Clust-UGC0002107	595	1	0	0	0
UGC0002315	Clust-UGC0002107	6307	6	1	0	1
UGC0009690	Clust-UGC0002107	1276	2	1	0	1
UGC0009502	Clust-UGC0002107	4578	2	1	0	1
UGC0006331	Clust-UGC0002107	7340	20	1	1	1
UGC0011908	Clust-UGC0002107	4789	12	1	1	1
UGC0007249	Clust-UGC0002107	4594	5	1	1	1
UGC0009523	Clust-UGC0002107	7763	32	1	0	1
UGC0012324	Clust-UGC0002107	3913	6	1	0	1
UGC0007400	Clust-UGC0002107	363	1	0	0	0
UGC0005891	Clust-UGC0002107	5325	4	1	0	1
UGC0002561	Clust-UGC0002107	433	1	0	0	0
UGC0012791	Clust-UGC0002107	2541	3	1	0	1
UGC0009750	Clust-UGC0002107	2791	2	1	0	1
UGC0006660	Clust-UGC0002107	2824	3	1	0	1
UGC0006031	Clust-UGC0002107	4325	4	1	0	1
UGC0012255	Clust-UGC0002107	9765	47	1	0	1
UGC0006939	Clust-UGC0002107	5799	10	1	0	1
UGC0009003	Clust-UGC0002107	4028	4	1	0	1
UGC0011634	Clust-UGC0002107	869	2	1	0	1
UGC0006311	Clust-UGC0002107	2907	3	1	0	1
UGC0011406	Clust-UGC0002107	3643	3	1	0	1
UGC0010209	Clust-UGC0002107	1879	1	0	0	0
UGC0005936	Clust-UGC0002107	2374	1	0	0	0
UGC0007422	Clust-UGC0002107	6688	15	1	0	1
UGC0011498	Clust-UGC0002107	780	2	1	0	1
UGC0008009	Clust-UGC0002107	1337	3	1	1	1
UGC0005973	Clust-UGC0002107	98	1	0	0	0
UGC0009994	Clust-UGC0002107	696	1	0	0	0
UGC0011801	Clust-UGC0002107	1727	2	1	0	0
UGC0007123	Clust-UGC0002107	647	1	0	0	0
UGC0012777	Clust-UGC0002107	981	1	0	0	0
UGC0010886	Clust-UGC0002107	2264	2	1	0	1
UGC0005860	Clust-UGC0002107	3896	5	1	0	1
UGC0002209	Clust-UGC0002107	1153	2	1	0	1
UGC0006465	Clust-UGC0002107	1723	1	0	0	0
UGC0013104	Clust-UGC0002107	999	1	0	0	0
UGC0008839	Clust-UGC0002107	3242	4	1	1	1
UGC0011535	Clust-UGC0002107	5836	6	1	0	1
UGC0010587	Clust-UGC0002107	4112	2	1	0	1
UGC0006361	Clust-UGC0002107	4580	3	1	0	1
UGC0007892	Clust-UGC0002107	10565	64	1	1	1
UGC0007546	Clust-UGC0002107	8567	29	1	0	1
UGC0004150	Clust-UGC0002107	1013	1	0	0	0
UGC0002308	Clust-UGC0002107	2325	6	1	1	1
UGC0005963	Clust-UGC0002107	1274	2	1	0	1
UGC0009682	Clust-UGC0002107	1681	4	1	1	1
UGC0011164	Clust-UGC0002107	3337	6	1	1	1
UGC0011578	Clust-UGC0002107	1705	2	1	0	1
UGC0007913	Clust-UGC0002107	2374	2	1	0	1
UGC0011493	Clust-UGC0002107	16060	174	1	0	1
UGC0013394	Clust-UGC0002107	187	1	0	0	0
UGC0004114	Clust-UGC0002107	1703	1	0	0	0
UGC0005943	Clust-UGC0002107	2738	2	1	0	1
UGC0009709	Clust-UGC0002107	897	2	1	0	1
UGC0011914	Clust-UGC0002107	685	1	0	0	0
UGC0004751	Clust-UGC0002107	496	2	1	0	1
UGC0013216	Clust-UGC0002107	332	1	0	0	0
UGC0009557	Clust-UGC0002107	2244	2	1	0	1
UGC0002364	Clust-UGC0002107	273	1	0	0	0
UGC0003716	Clust-UGC0002107	1443	1	0	0	0
UGC0003016	Clust-UGC0002107	744	2	1	0	1
UGC0007605	Clust-UGC0002107	4482	5	1	0	1
UGC0011783	Clust-UGC0002107	3463	3	1	1	1
UGC0009295	Clust-UGC0002107	639	1	0	0	0
UGC0007378	Clust-UGC0002107	602	2	1	1	0
UGC0004502	Clust-UGC0002107	6222	6	1	0	1
UGC0005023	Clust-UGC0002107	2076	3	1	0	1
UGC0009420	Clust-UGC0002107	3061	1	0	0	0
UGC0011607	Clust-UGC0002107	3415	5	1	1	1
UGC0003026	Clust-UGC0002107	1394	2	1	0	1
UGC0009277	Clust-UGC0002107	4091	6	1	0	1
UGC0007135	Clust-UGC0002107	4909	6	1	0	1
UGC0006085	Clust-UGC0002107	3055	2	1	0	1
UGC0006081	Clust-UGC0002107	602	2	1	0	1
UGC0007682	Clust-UGC0002107	9251	52	1	1	1
UGC0011809	Clust-UGC0002107	4973	4	1	0	1
UGC0011808	Clust-UGC0002107	1488	1	0	0	0
UGC0007552	Clust-UGC0002107	7387	19	1	0	1
UGC0011581	Clust-UGC0002107	10819	80	1	0	1
UGC0007539	Clust-UGC0002107	8890	35	1	0	1
UGC0008965	Clust-UGC0002107	1134	2	1	0	1
UGC0007709	Clust-UGC0002107	6298	12	1	0	1
UGC0009584	Clust-UGC0002107	2633	5	1	1	1
UGC0011527	Clust-UGC0002107	6396	10	1	0	1
UGC0002107	Clust-UGC0002107	4206	6	1	0	1
UGC0008823	Clust-UGC0002107	1073	1	0	0	0
UGC0009483	Clust-UGC0002107	5484	10	1	0	1
UGC0011967	Clust-UGC0002107	437	2	1	0	1
UGC0006686	Clust-UGC0002107	8280	18	1	0	1
UGC0011503	Clust-UGC0002107	1167	1	0	0	0
UGC0010105	Clust-UGC0002107	3434	2	1	0	1
UGC0005819	Clust-UGC0002107	6983	21	1	0	1
UGC0009675	Clust-UGC0002107	5859	14	1	0	1
UGC0009673	Clust-UGC0002107	3222	2	1	0	1
UGC0006540	Clust-UGC0002107	1693	1	0	0	0
UGC0003783	Clust-UGC0002107	368	1	0	0	0
UGC0006158	Clust-UGC0002107	340	2	1	0	1
UGC0006157	Clust-UGC0002107	1407	2	1	0	1
UGC0006156	Clust-UGC0002107	1724	2	1	0	1
UGC0005689	Clust-UGC0002108	2234	1	0	0	0
UGC0002108	Clust-UGC0002108	1032	1	0	0	0
UGC0012804	Clust-UGC0002110	1045	1	0	0	0
UGC0011404	Clust-UGC0002110	4840	5	1	0	1
UGC0006778	Clust-UGC0002110	7098	6	1	0	0
UGC0005956	Clust-UGC0002110	2907	2	1	0	1
UGC0003329	Clust-UGC0002110	3312	2	1	0	1
UGC0010842	Clust-UGC0002110	2246	1	0	0	0
UGC0005750	Clust-UGC0002110	4233	1	0	0	0
UGC0011487	Clust-UGC0002110	8630	7	1	0	1
UGC0002351	Clust-UGC0002110	3669	3	1	1	0
UGC0005341	Clust-UGC0002110	2449	2	1	0	1
UGC0010083	Clust-UGC0002110	7699	1	0	0	0
UGC0003543	Clust-UGC0002110	8789	3	1	0	1
UGC0008551	Clust-UGC0002110	4524	3	1	0	1
UGC0002522	Clust-UGC0002110	2946	1	0	0	0
UGC0010577	Clust-UGC0002110	2965	1	0	0	0
UGC0005021	Clust-UGC0002110	8958	7	1	0	1
UGC0012726	Clust-UGC0002110	3638	3	1	0	1
UGC0011011	Clust-UGC0002110	9009	4	1	0	1
UGC0008656	Clust-UGC0002110	2818	1	0	0	0
UGC0002975	Clust-UGC0002110	2441	2	1	0	1
UGC0002110	Clust-UGC0002110	9837	4	1	0	1
UGC0006847	Clust-UGC0002110	1319	1	0	0	0
UGC0006862	Clust-UGC0002110	2926	3	1	1	0
UGC0008406	Clust-UGC0002110	2880	3	1	1	1
UGC0008789	Clust-UGC0002110	2319	2	1	0	1
UGC0002293	Clust-UGC0002111	8538	22	1	0	1
UGC0010869	Clust-UGC0002111	1112	1	0	0	0
UGC0006466	Clust-UGC0002111	3489	2	1	0	0
UGC0002949	Clust-UGC0002111	1301	1	0	0	0
UGC0008191	Clust-UGC0002111	3777	4	1	0	1
UGC0012184	Clust-UGC0002111	6748	13	1	0	1
UGC0002111	Clust-UGC0002111	6848	13	1	0	1
UGC0007973	Clust-UGC0002111	847	1	0	0	0
UGC0006494	Clust-UGC0002111	1971	1	0	0	0
UGC0006004	Clust-UGC0002111	5277	1	0	0	0
UGC0005595	Clust-UGC0002111	2021	1	0	0	0
UGC0002373	Clust-UGC0002111	584	1	0	0	0
UGC0012778	Clust-UGC0002111	3333	7	1	0	1
UGC0007111	Clust-UGC0002111	1860	2	1	1	0
UGC0012655	Clust-UGC0002111	6868	13	1	0	1
UGC0013301	Clust-UGC0002111	128	1	0	0	0
UGC0003738	Clust-UGC0002111	648	1	0	0	0
UGC0008339	Clust-UGC0002111	1505	1	0	0	0
UGC0002311	Clust-UGC0002112	5425	5	1	0	1
UGC0013159	Clust-UGC0002112	1273	2	1	0	1
UGC0007048	Clust-UGC0002112	1785	2	1	0	1
UGC0003574	Clust-UGC0002112	9466	22	1	0	1
UGC0007069	Clust-UGC0002112	3304	1	0	0	0
UGC0007405	Clust-UGC0002112	4328	5	1	0	1
UGC0007267	Clust-UGC0002112	6417	14	1	0	1
UGC0008526	Clust-UGC0002112	2247	1	0	0	0
UGC0007148	Clust-UGC0002112	679	1	0	0	0
UGC0012579	Clust-UGC0002112	2270	2	1	0	0
UGC0005868	Clust-UGC0002112	2900	5	1	0	1
UGC0012215	Clust-UGC0002112	5678	5	1	0	1
UGC0008209	Clust-UGC0002112	2008	3	1	1	1
UGC0012235	Clust-UGC0002112	5019	4	1	0	1
UGC0002112	Clust-UGC0002112	6293	6	1	0	1
UGC0007238	Clust-UGC0002112	3622	2	1	0	1
UGC0002350	Clust-UGC0002112	2181	1	0	0	0
UGC0008854	Clust-UGC0002112	1996	1	0	0	0
UGC0007583	Clust-UGC0002112	8991	32	1	0	1
UGC0007587	Clust-UGC0002112	3581	2	1	0	1
UGC0007645	Clust-UGC0002112	7142	19	1	0	1
UGC0004991	Clust-UGC0002112	8884	29	1	0	1
UGC0012912	Clust-UGC0002112	11218	62	1	1	1
UGC0009158	Clust-UGC0002112	969	1	0	0	0
UGC0007119	Clust-UGC0002112	1262	1	0	0	0
UGC0005701	Clust-UGC0002112	8119	28	1	0	1
UGC0007518	Clust-UGC0002112	7110	10	1	0	1
UGC0009350	Clust-UGC0002112	3548	4	1	1	1
UGC0003730	Clust-UGC0002112	981	1	0	0	0
UGC0009193	Clust-UGC0002114	2771	2	1	0	1
UGC0008485	Clust-UGC0002114	1176	1	0	0	0
UGC0007907	Clust-UGC0002114	6442	23	1	0	1
UGC0008844	Clust-UGC0002114	2484	2	1	0	1
UGC0005659	Clust-UGC0002114	3337	4	1	0	1
UGC0005653	Clust-UGC0002114	1211	1	0	0	0
UGC0011137	Clust-UGC0002114	1807	1	0	0	0
UGC0010249	Clust-UGC0002114	3264	3	1	0	1
UGC0005611	Clust-UGC0002114	4511	2	1	0	1
UGC0005618	Clust-UGC0002114	5605	8	1	0	1
UGC0012922	Clust-UGC0002114	2256	2	1	0	1
UGC0008519	Clust-UGC0002114	450	1	0	0	0
UGC0005051	Clust-UGC0002114	1642	1	0	0	0
UGC0005636	Clust-UGC0002114	5235	3	1	0	1
UGC0008520	Clust-UGC0002114	212	1	0	0	0
UGC0006898	Clust-UGC0002114	1254	3	1	0	1
UGC0008531	Clust-UGC0002114	658	1	0	0	0
UGC0004964	Clust-UGC0002114	6988	11	1	0	1
UGC0002501	Clust-UGC0002114	1163	1	0	0	0
UGC0006422	Clust-UGC0002114	1495	1	0	0	0
UGC0006054	Clust-UGC0002114	322	1	0	0	0
UGC0008047	Clust-UGC0002114	2831	1	0	0	0
UGC0013333	Clust-UGC0002114	5862	9	1	2	1
UGC0008413	Clust-UGC0002114	1986	1	0	0	0
UGC0008361	Clust-UGC0002114	874	1	0	0	0
UGC0002153	Clust-UGC0002114	5210	3	1	0	1
UGC0002154	Clust-UGC0002114	3140	3	1	0	1
UGC0004472	Clust-UGC0002114	4714	8	1	0	1
UGC0002135	Clust-UGC0002114	2241	4	1	0	1
UGC0005128	Clust-UGC0002114	2189	2	1	0	1
UGC0007950	Clust-UGC0002114	1895	2	1	0	1
UGC0005559	Clust-UGC0002114	2372	1	0	0	0
UGC0008227	Clust-UGC0002114	108	1	0	0	0
UGC0007934	Clust-UGC0002114	3327	3	1	0	1
UGC0007939	Clust-UGC0002114	1942	2	1	0	1
UGC0008301	Clust-UGC0002114	1217	1	0	0	0
UGC0007217	Clust-UGC0002114	2148	2	1	0	1
UGC0008266	Clust-UGC0002114	260	1	0	0	0
UGC0009135	Clust-UGC0002114	4494	7	1	0	1
UGC0009137	Clust-UGC0002114	4517	5	1	0	1
UGC0007664	Clust-UGC0002114	3128	2	1	0	1
UGC0003547	Clust-UGC0002114	11009	48	1	0	1
UGC0010455	Clust-UGC0002114	3740	1	0	0	0
UGC0010082	Clust-UGC0002114	4093	2	1	0	1
UGC0004734	Clust-UGC0002114	2036	2	1	0	1
UGC0009579	Clust-UGC0002114	3192	2	1	0	0
UGC0007353	Clust-UGC0002114	2901	1	0	0	0
UGC0007607	Clust-UGC0002114	3084	2	1	0	1
UGC0012871	Clust-UGC0002114	2068	2	1	0	0
UGC0012878	Clust-UGC0002114	9976	41	1	0	1
UGC0012663	Clust-UGC0002114	5977	14	1	0	1
UGC0008505	Clust-UGC0002114	1564	1	0	0	0
UGC0008528	Clust-UGC0002114	210	1	0	0	0
UGC0010551	Clust-UGC0002114	3596	1	0	0	0
UGC0005555	Clust-UGC0002114	2438	2	1	0	1
UGC0004542	Clust-UGC0002114	5806	6	1	0	1
UGC0007457	Clust-UGC0002114	4351	3	1	0	1
UGC0012919	Clust-UGC0002114	363	1	0	0	0
UGC0003583	Clust-UGC0002114	8663	30	1	0	1
UGC0010188	Clust-UGC0002114	2327	1	0	0	0
UGC0009091	Clust-UGC0002114	1754	3	1	0	1
UGC0008459	Clust-UGC0002114	1065	1	0	0	0
UGC0002114	Clust-UGC0002114	3463	2	1	0	0
UGC0003556	Clust-UGC0002114	10461	42	1	0	1
UGC0013326	Clust-UGC0002114	5439	8	1	0	1
UGC0013329	Clust-UGC0002114	6400	8	1	2	1
UGC0013302	Clust-UGC0002114	1957	1	0	0	0
UGC0005112	Clust-UGC0002114	1917	1	0	0	0
UGC0004091	Clust-UGC0002114	64	1	0	0	0
UGC0008215	Clust-UGC0002114	2995	2	1	0	1
UGC0007573	Clust-UGC0002114	1879	2	1	0	1
UGC0011504	Clust-UGC0002114	2785	1	0	0	0
UGC0009679	Clust-UGC0002114	1334	1	0	0	0
UGC0008253	Clust-UGC0002114	1596	1	0	0	0
UGC0008330	Clust-UGC0002114	687	1	0	0	0
UGC0008803	Clust-UGC0002114	2515	1	0	0	0
UGC0007774	Clust-UGC0002114	2895	5	1	0	0
UGC0006318	Clust-UGC0002115	7716	19	1	0	1
UGC0007260	Clust-UGC0002115	6336	10	1	0	1
UGC0006508	Clust-UGC0002115	3546	2	1	0	1
UGC0006057	Clust-UGC0002115	4588	5	1	0	1
UGC0007903	Clust-UGC0002115	5420	2	1	0	1
UGC0006338	Clust-UGC0002115	2482	1	0	0	0
UGC0007002	Clust-UGC0002115	7011	23	1	0	1
UGC0013249	Clust-UGC0002115	6754	10	1	0	1
UGC0006760	Clust-UGC0002115	8104	22	1	0	1
UGC0007180	Clust-UGC0002115	2575	3	1	0	1
UGC0007368	Clust-UGC0002115	4979	4	1	0	1
UGC0007458	Clust-UGC0002115	4430	5	1	0	1
UGC0009262	Clust-UGC0002115	10818	69	1	0	1
UGC0010016	Clust-UGC0002115	2175	1	0	0	0
UGC0009203	Clust-UGC0002115	4451	2	1	0	1
UGC0006903	Clust-UGC0002115	4777	1	0	0	0
UGC0006424	Clust-UGC0002115	7728	23	1	0	1
UGC0007101	Clust-UGC0002115	2617	3	1	0	1
UGC0007503	Clust-UGC0002115	7059	15	1	0	1
UGC0009349	Clust-UGC0002115	7919	18	1	0	1
UGC0013295	Clust-UGC0002115	2060	3	1	1	1
UGC0005776	Clust-UGC0002115	8371	28	1	0	1
UGC0009492	Clust-UGC0002115	297	1	0	0	0
UGC0004155	Clust-UGC0002115	5499	5	1	0	1
UGC0008870	Clust-UGC0002115	4284	3	1	0	1
UGC0009728	Clust-UGC0002115	4678	5	1	0	1
UGC0006517	Clust-UGC0002115	1508	1	0	0	0
UGC0012294	Clust-UGC0002115	3472	3	1	0	1
UGC0009707	Clust-UGC0002115	3798	3	1	0	1
UGC0009551	Clust-UGC0002115	686	1	0	0	0
UGC0009766	Clust-UGC0002115	4599	6	1	0	1
UGC0007451	Clust-UGC0002115	2759	1	0	0	0
UGC0003037	Clust-UGC0002115	2994	2	1	0	1
UGC0006837	Clust-UGC0002115	3580	4	1	0	1
UGC0009290	Clust-UGC0002115	3247	3	1	1	1
UGC0005838	Clust-UGC0002115	6861	12	1	0	1
UGC0007193	Clust-UGC0002115	2503	2	1	0	1
UGC0007197	Clust-UGC0002115	4015	5	1	0	1
UGC0007370	Clust-UGC0002115	2294	1	0	0	0
UGC0007411	Clust-UGC0002115	6084	8	1	0	1
UGC0005895	Clust-UGC0002115	4242	3	1	0	1
UGC0009785	Clust-UGC0002115	4957	7	1	0	1
UGC0007683	Clust-UGC0002115	7382	23	1	0	1
UGC0009098	Clust-UGC0002115	848	1	0	0	0
UGC0007497	Clust-UGC0002115	10013	32	1	0	2
UGC0002115	Clust-UGC0002115	3194	3	1	0	1
UGC0009392	Clust-UGC0002115	7585	19	1	0	1
UGC0007392	Clust-UGC0002115	3362	3	1	0	1
UGC0011144	Clust-UGC0002115	2401	2	1	0	1
UGC0009610	Clust-UGC0002115	2163	1	0	0	0
UGC0009639	Clust-UGC0002115	1597	2	1	0	1
UGC0007963	Clust-UGC0002115	3056	5	1	0	1
UGC0008236	Clust-UGC0002115	3031	2	1	0	1
UGC0006685	Clust-UGC0002115	4508	1	0	0	0
UGC0006747	Clust-UGC0002115	3247	2	1	0	1
UGC0008805	Clust-UGC0002115	3371	3	1	0	1
UGC0006554	Clust-UGC0002116	2331	1	0	0	0
UGC0004783	Clust-UGC0002116	6137	9	1	1	1
UGC0007044	Clust-UGC0002116	2978	1	0	0	0
UGC0012112	Clust-UGC0002116	3081	2	1	0	1
UGC0006710	Clust-UGC0002116	1124	1	0	0	0
UGC0002527	Clust-UGC0002116	3097	1	0	0	0
UGC0005932	Clust-UGC0002116	5459	7	1	0	1
UGC0006914	Clust-UGC0002116	1708	1	0	0	0
UGC0007307	Clust-UGC0002116	6693	11	1	0	1
UGC0012552	Clust-UGC0002116	4710	4	1	0	1
UGC0005778	Clust-UGC0002116	9599	43	1	0	1
UGC0007443	Clust-UGC0002116	894	1	0	0	0
UGC0006635	Clust-UGC0002116	735	1	0	0	0
UGC0003305	Clust-UGC0002116	2485	2	1	0	0
UGC0006986	Clust-UGC0002116	5994	12	1	0	1
UGC0005699	Clust-UGC0002116	374	1	0	0	0
UGC0006618	Clust-UGC0002116	878	1	0	0	0
UGC0002964	Clust-UGC0002116	2453	2	1	0	1
UGC0004576	Clust-UGC0002116	5961	4	1	0	1
UGC0008049	Clust-UGC0002116	6055	16	1	0	1
UGC0007714	Clust-UGC0002116	3498	2	1	0	0
UGC0009165	Clust-UGC0002116	511	1	0	0	0
UGC0007522	Clust-UGC0002116	7811	23	1	0	1
UGC0002543	Clust-UGC0002116	2271	1	0	0	0
UGC0011179	Clust-UGC0002116	4725	6	1	0	1
UGC0006787	Clust-UGC0002116	5998	9	1	0	1
UGC0003607	Clust-UGC0002116	8023	25	1	0	1
UGC0003602	Clust-UGC0002116	11944	65	1	0	1
UGC0002138	Clust-UGC0002116	2382	3	1	0	1
UGC0010112	Clust-UGC0002116	11593	64	1	0	1
UGC0002116	Clust-UGC0002116	2729	2	1	0	1
UGC0007896	Clust-UGC0002116	11306	83	1	0	1
UGC0007932	Clust-UGC0002116	7903	30	1	0	1
UGC0007275	Clust-UGC0002116	5370	4	1	0	1
UGC0002987	Clust-UGC0002116	2371	1	0	0	0
UGC0004802	Clust-UGC0002116	12213	80	1	0	1
UGC0008289	Clust-UGC0002116	1534	1	0	0	0
UGC0010274	Clust-UGC0002116	12396	57	1	1	1
UGC0013238	Clust-UGC0002116	2317	1	0	0	0
UGC0003261	Clust-UGC0002116	3910	2	1	0	1
UGC0005042	Clust-UGC0002116	2069	2	1	0	1
UGC0005971	Clust-UGC0002116	2213	1	0	0	0
UGC0007194	Clust-UGC0002116	2835	3	1	0	1
UGC0007413	Clust-UGC0002116	1958	1	0	0	0
UGC0007173	Clust-UGC0002116	343	1	0	0	0
UGC0005927	Clust-UGC0002116	2744	1	0	0	0
UGC0005742	Clust-UGC0002116	1182	1	0	0	0
UGC0005516	Clust-UGC0002116	1629	1	0	0	0
UGC0008452	Clust-UGC0002116	1085	1	0	0	0
UGC0002117	Clust-UGC0002116	2440	1	0	0	0
UGC0005532	Clust-UGC0002116	190	1	0	0	0
UGC0008574	Clust-UGC0002116	3858	2	1	0	1
UGC0006135	Clust-UGC0002116	1901	1	0	0	0
UGC0008181	Clust-UGC0002116	5577	8	1	0	1
UGC0005852	Clust-UGC0002116	3292	2	1	0	1
UGC0002375	Clust-UGC0002116	959	1	0	0	0
UGC0006807	Clust-UGC0002116	4306	1	0	0	0
UGC0004663	Clust-UGC0002116	3250	2	1	0	1
UGC0006541	Clust-UGC0002116	3704	2	1	0	1
UGC0005359	Clust-UGC0002118	3119	6	1	0	1
UGC0002563	Clust-UGC0002118	135	1	0	0	0
UGC0002171	Clust-UGC0002118	4937	5	1	0	1
UGC0006161	Clust-UGC0002118	828	1	0	0	0
UGC0002118	Clust-UGC0002118	7130	12	1	0	1
UGC0004500	Clust-UGC0002118	4272	4	1	0	1
UGC0011627	Clust-UGC0002118	1197	4	1	0	0
UGC0002120	Clust-UGC0002120	3471	5	1	0	1
UGC0009411	Clust-UGC0002121	5500	5	1	0	1
UGC0005374	Clust-UGC0002121	7950	22	1	0	1
UGC0007043	Clust-UGC0002121	687	1	0	0	0
UGC0012111	Clust-UGC0002121	4410	2	1	0	1
UGC0011135	Clust-UGC0002121	1689	1	0	0	0
UGC0010244	Clust-UGC0002121	749	1	0	0	0
UGC0010245	Clust-UGC0002121	909	1	0	0	0
UGC0009284	Clust-UGC0002121	7333	16	1	0	1
UGC0009283	Clust-UGC0002121	3072	2	1	0	1
UGC0009027	Clust-UGC0002121	1297	1	0	0	0
UGC0007280	Clust-UGC0002121	5794	8	1	0	1
UGC0007499	Clust-UGC0002121	4613	2	1	0	1
UGC0012257	Clust-UGC0002121	2857	2	1	0	1
UGC0010226	Clust-UGC0002121	3238	4	1	0	0
UGC0010074	Clust-UGC0002121	1754	1	0	0	0
UGC0005058	Clust-UGC0002121	2343	1	0	0	0
UGC0010822	Clust-UGC0002121	3583	8	1	0	1
UGC0010018	Clust-UGC0002121	198	1	0	0	0
UGC0004816	Clust-UGC0002121	7635	11	1	0	1
UGC0009207	Clust-UGC0002121	3214	1	0	0	0
UGC0007460	Clust-UGC0002121	2570	1	0	0	0
UGC0005361	Clust-UGC0002121	1784	1	0	0	0
UGC0005567	Clust-UGC0002121	2459	2	1	0	1
UGC0003593	Clust-UGC0002121	5915	7	1	0	1
UGC0005735	Clust-UGC0002121	2356	2	1	0	1
UGC0002140	Clust-UGC0002121	5596	4	1	0	1
UGC0009417	Clust-UGC0002121	5531	15	1	0	1
UGC0006317	Clust-UGC0002121	6860	9	1	0	1
UGC0007262	Clust-UGC0002121	7085	17	1	1	1
UGC0005718	Clust-UGC0002121	4103	5	1	0	1
UGC0005710	Clust-UGC0002121	8092	18	1	0	1
UGC0010077	Clust-UGC0002121	13503	64	1	1	1
UGC0007388	Clust-UGC0002121	277	1	0	0	0
UGC0002545	Clust-UGC0002121	817	1	0	0	0
UGC0007306	Clust-UGC0002121	6950	15	1	0	1
UGC0009719	Clust-UGC0002121	4424	5	1	0	1
UGC0006107	Clust-UGC0002121	2381	2	1	0	1
UGC0012060	Clust-UGC0002121	3124	2	1	0	1
UGC0007504	Clust-UGC0002121	3129	2	1	0	1
UGC0003010	Clust-UGC0002121	3510	1	0	0	0
UGC0012958	Clust-UGC0002121	5740	11	1	0	1
UGC0009128	Clust-UGC0002121	8872	24	1	0	1
UGC0013298	Clust-UGC0002121	743	2	1	1	0
UGC0010966	Clust-UGC0002121	1583	4	1	0	0
UGC0011189	Clust-UGC0002121	8524	26	1	0	1
UGC0011181	Clust-UGC0002121	12734	90	1	0	1
UGC0007097	Clust-UGC0002121	3312	3	1	0	1
UGC0010176	Clust-UGC0002121	338	1	0	0	0
UGC0004841	Clust-UGC0002121	7784	13	1	0	1
UGC0010158	Clust-UGC0002121	7629	15	1	0	1
UGC0004177	Clust-UGC0002121	2084	3	1	0	1
UGC0007668	Clust-UGC0002121	5607	7	1	0	1
UGC0009723	Clust-UGC0002121	3498	3	1	0	1
UGC0011936	Clust-UGC0002121	4669	5	1	0	1
UGC0007051	Clust-UGC0002121	833	1	0	0	0
UGC0002369	Clust-UGC0002121	307	1	0	0	0
UGC0003545	Clust-UGC0002121	6907	7	1	0	1
UGC0008894	Clust-UGC0002121	5880	6	1	0	1
UGC0012312	Clust-UGC0002121	1192	1	0	0	0
UGC0005063	Clust-UGC0002121	4076	3	1	0	1
UGC0007352	Clust-UGC0002121	3476	1	0	0	0
UGC0012785	Clust-UGC0002121	818	1	0	0	0
UGC0010258	Clust-UGC0002121	480	1	0	0	0
UGC0010251	Clust-UGC0002121	750	2	1	0	1
UGC0006743	Clust-UGC0002121	610	1	0	0	0
UGC0007291	Clust-UGC0002121	9370	36	1	0	1
UGC0005756	Clust-UGC0002121	8433	22	1	0	1
UGC0008730	Clust-UGC0002121	2673	3	1	0	1
UGC0008644	Clust-UGC0002121	1559	1	0	0	0
UGC0007319	Clust-UGC0002121	3080	1	0	0	0
UGC0006781	Clust-UGC0002121	7118	15	1	0	1
UGC0010555	Clust-UGC0002121	2886	3	1	0	1
UGC0005557	Clust-UGC0002121	1800	1	0	0	0
UGC0005009	Clust-UGC0002121	7356	9	1	0	1
UGC0012190	Clust-UGC0002121	2872	1	0	0	0
UGC0010760	Clust-UGC0002121	2314	4	1	0	0
UGC0010494	Clust-UGC0002121	2624	3	1	0	1
UGC0005576	Clust-UGC0002121	2943	1	0	0	0
UGC0005570	Clust-UGC0002121	2113	2	1	1	0
UGC0005687	Clust-UGC0002121	4737	5	1	0	1
UGC0007687	Clust-UGC0002121	6661	8	1	0	1
UGC0010856	Clust-UGC0002121	3300	2	1	0	1
UGC0003306	Clust-UGC0002121	6074	9	1	0	1
UGC0009983	Clust-UGC0002121	5481	9	1	0	1
UGC0010878	Clust-UGC0002121	4234	4	1	0	1
UGC0006600	Clust-UGC0002121	1866	2	1	0	1
UGC0005724	Clust-UGC0002121	7510	20	1	1	1
UGC0005722	Clust-UGC0002121	5804	7	1	0	1
UGC0005729	Clust-UGC0002121	6116	5	1	0	1
UGC0009118	Clust-UGC0002121	1182	1	0	0	0
UGC0007517	Clust-UGC0002121	6355	4	1	0	1
UGC0002121	Clust-UGC0002121	5720	9	1	0	1
UGC0006568	Clust-UGC0002121	4135	6	1	0	1
UGC0006357	Clust-UGC0002121	8018	11	1	1	1
UGC0007084	Clust-UGC0002121	3841	1	0	0	0
UGC0007220	Clust-UGC0002121	2771	2	1	0	1
UGC0006544	Clust-UGC0002121	1226	1	0	0	0
UGC0002312	Clust-UGC0002122	2960	3	1	0	1
UGC0009142	Clust-UGC0002122	71	1	0	0	0
UGC0007928	Clust-UGC0002122	8426	30	1	0	1
UGC0006523	Clust-UGC0002122	118	1	0	0	0
UGC0008310	Clust-UGC0002122	944	2	1	0	1
UGC0009732	Clust-UGC0002122	2854	2	1	0	1
UGC0006310	Clust-UGC0002122	4957	4	1	0	1
UGC0007040	Clust-UGC0002122	3018	2	1	0	1
UGC0010147	Clust-UGC0002122	92	1	0	0	0
UGC0006671	Clust-UGC0002122	1703	1	0	0	0
UGC0007902	Clust-UGC0002122	8552	26	1	0	1
UGC0005950	Clust-UGC0002122	994	2	1	0	1
UGC0004591	Clust-UGC0002122	3609	3	1	1	0
UGC0004597	Clust-UGC0002122	5705	6	1	0	1
UGC0007066	Clust-UGC0002122	2640	2	1	0	1
UGC0007067	Clust-UGC0002122	1787	1	0	0	0
UGC0002995	Clust-UGC0002122	2082	2	1	0	1
UGC0006127	Clust-UGC0002122	1506	1	0	0	0
UGC0003760	Clust-UGC0002122	356	1	0	0	0
UGC0006713	Clust-UGC0002122	3039	2	1	0	1
UGC0005399	Clust-UGC0002122	3847	2	1	0	1
UGC0007633	Clust-UGC0002122	7356	16	1	0	1
UGC0008880	Clust-UGC0002122	2159	1	0	0	0
UGC0012653	Clust-UGC0002122	2881	3	1	0	1
UGC0010223	Clust-UGC0002122	360	2	1	0	1
UGC0011792	Clust-UGC0002122	3187	2	1	0	0
UGC0006937	Clust-UGC0002122	4949	7	1	1	1
UGC0011635	Clust-UGC0002122	4704	3	1	0	1
UGC0005585	Clust-UGC0002122	2558	1	0	0	0
UGC0004982	Clust-UGC0002122	247	1	0	0	0
UGC0005639	Clust-UGC0002122	2544	1	0	0	0
UGC0007187	Clust-UGC0002122	1890	2	1	0	1
UGC0007362	Clust-UGC0002122	2030	1	0	0	0
UGC0002523	Clust-UGC0002122	718	1	0	0	0
UGC0002526	Clust-UGC0002122	862	1	0	0	0
UGC0008534	Clust-UGC0002122	1733	1	0	0	0
UGC0009160	Clust-UGC0002122	703	1	0	0	0
UGC0008407	Clust-UGC0002122	1558	1	0	0	0
UGC0011425	Clust-UGC0002122	9283	42	1	0	1
UGC0008024	Clust-UGC0002122	2956	2	1	0	1
UGC0009048	Clust-UGC0002122	534	1	0	0	0
UGC0006650	Clust-UGC0002122	1877	2	1	0	1
UGC0011481	Clust-UGC0002122	3163	4	1	0	1
UGC0007440	Clust-UGC0002122	1151	1	0	0	0
UGC0010542	Clust-UGC0002122	3626	1	0	0	0
UGC0004815	Clust-UGC0002122	4743	5	1	0	1
UGC0005540	Clust-UGC0002122	1741	2	1	0	1
UGC0006091	Clust-UGC0002122	2292	1	0	0	0
UGC0006636	Clust-UGC0002122	1343	2	1	0	1
UGC0006952	Clust-UGC0002122	5037	2	1	0	1
UGC0006984	Clust-UGC0002122	2753	3	1	1	1
UGC0006985	Clust-UGC0002122	3577	1	0	0	0
UGC0003596	Clust-UGC0002122	4942	3	1	0	1
UGC0008453	Clust-UGC0002122	276	1	0	0	0
UGC0002969	Clust-UGC0002122	611	1	0	0	0
UGC0006426	Clust-UGC0002122	2798	3	1	0	1
UGC0010508	Clust-UGC0002122	3490	2	1	0	1
UGC0002192	Clust-UGC0002122	170	1	0	0	0
UGC0013350	Clust-UGC0002122	3659	4	1	1	1
UGC0013355	Clust-UGC0002122	3513	2	1	0	1
UGC0006852	Clust-UGC0002122	1886	1	0	0	0
UGC0008431	Clust-UGC0002122	2292	2	1	0	1
UGC0008404	Clust-UGC0002122	5089	4	1	0	1
UGC0006641	Clust-UGC0002122	1259	2	1	0	1
UGC0006384	Clust-UGC0002122	6462	11	1	0	1
UGC0007732	Clust-UGC0002122	5122	5	1	0	1
UGC0008362	Clust-UGC0002122	1342	1	0	0	0
UGC0008360	Clust-UGC0002122	854	1	0	0	0
UGC0004675	Clust-UGC0002122	6721	15	1	0	1
UGC0007502	Clust-UGC0002122	3412	2	1	0	1
UGC0008193	Clust-UGC0002122	6026	8	1	0	1
UGC0009347	Clust-UGC0002122	4315	2	1	0	1
UGC0004477	Clust-UGC0002122	6044	8	1	0	1
UGC0004475	Clust-UGC0002122	5493	8	1	0	1
UGC0005120	Clust-UGC0002122	1951	2	1	0	1
UGC0007564	Clust-UGC0002122	5919	6	1	0	1
UGC0005808	Clust-UGC0002122	5607	5	1	0	1
UGC0006579	Clust-UGC0002122	1019	2	1	0	1
UGC0008225	Clust-UGC0002122	500	1	0	0	0
UGC0010588	Clust-UGC0002122	2226	2	1	0	1
UGC0009322	Clust-UGC0002122	5154	4	1	0	1
UGC0002309	Clust-UGC0002122	5138	3	1	0	1
UGC0007219	Clust-UGC0002122	1364	1	0	0	0
UGC0010629	Clust-UGC0002122	1544	2	1	0	1
UGC0002326	Clust-UGC0002122	297	1	0	0	0
UGC0008729	Clust-UGC0002122	1201	1	0	0	0
UGC0003552	Clust-UGC0002122	8903	27	1	0	1
UGC0006536	Clust-UGC0002122	1148	1	0	0	0
UGC0007919	Clust-UGC0002122	7201	12	1	0	1
UGC0008268	Clust-UGC0002122	1248	2	1	0	1
UGC0010543	Clust-UGC0002122	2412	1	0	0	0
UGC0005987	Clust-UGC0002122	3363	2	1	0	1
UGC0007058	Clust-UGC0002122	2684	1	0	0	0
UGC0007581	Clust-UGC0002122	5799	4	1	0	1
UGC0006706	Clust-UGC0002122	521	1	0	0	0
UGC0004808	Clust-UGC0002122	12659	80	1	0	1
UGC0009538	Clust-UGC0002122	516	1	0	0	0
UGC0005641	Clust-UGC0002122	4035	2	1	0	1
UGC0012291	Clust-UGC0002122	2654	1	0	0	0
UGC0007641	Clust-UGC0002122	8686	35	1	0	1
UGC0011916	Clust-UGC0002122	15313	114	1	1	1
UGC0012623	Clust-UGC0002122	6615	7	1	0	1
UGC0008541	Clust-UGC0002122	638	1	0	0	0
UGC0006289	Clust-UGC0002122	2757	3	1	0	0
UGC0006286	Clust-UGC0002122	4358	2	1	0	0
UGC0006284	Clust-UGC0002122	4020	4	1	0	1
UGC0011453	Clust-UGC0002122	4064	4	1	0	1
UGC0005883	Clust-UGC0002122	4252	2	1	0	1
UGC0008475	Clust-UGC0002122	900	1	0	0	0
UGC0011668	Clust-UGC0002122	2055	2	1	0	0
UGC0006001	Clust-UGC0002122	3163	2	1	0	1
UGC0011471	Clust-UGC0002122	1188	2	1	0	0
UGC0011478	Clust-UGC0002122	2724	2	1	0	0
UGC0010257	Clust-UGC0002122	682	1	0	0	0
UGC0013003	Clust-UGC0002122	3643	4	1	0	1
UGC0006926	Clust-UGC0002122	2159	2	1	0	1
UGC0008557	Clust-UGC0002122	3544	3	1	0	1
UGC0008171	Clust-UGC0002122	264	1	0	0	0
UGC0005621	Clust-UGC0002122	3526	1	0	0	0
UGC0005977	Clust-UGC0002122	818	1	0	0	0
UGC0008696	Clust-UGC0002122	484	1	0	0	0
UGC0011625	Clust-UGC0002122	3706	1	0	0	0
UGC0011629	Clust-UGC0002122	2834	4	1	0	0
UGC0007137	Clust-UGC0002122	3627	1	0	0	0
UGC0008646	Clust-UGC0002122	226	1	0	0	0
UGC0008648	Clust-UGC0002122	1650	2	1	0	1
UGC0010573	Clust-UGC0002122	1941	2	1	0	1
UGC0008736	Clust-UGC0002122	1415	1	0	0	0
UGC0004996	Clust-UGC0002122	1836	2	1	0	1
UGC0006596	Clust-UGC0002122	1922	2	1	0	1
UGC0007179	Clust-UGC0002122	3510	1	0	0	0
UGC0007311	Clust-UGC0002122	1579	1	0	0	0
UGC0008032	Clust-UGC0002122	1110	1	0	0	0
UGC0008030	Clust-UGC0002122	3464	1	0	0	0
UGC0004529	Clust-UGC0002122	3947	2	1	0	1
UGC0006786	Clust-UGC0002122	4893	4	1	0	1
UGC0007785	Clust-UGC0002122	2533	2	1	0	1
UGC0005008	Clust-UGC0002122	2452	4	1	0	1
UGC0005558	Clust-UGC0002122	931	1	0	0	0
UGC0012646	Clust-UGC0002122	4281	4	1	0	1
UGC0010495	Clust-UGC0002122	5863	8	1	0	1
UGC0006358	Clust-UGC0002122	6875	13	1	0	1
UGC0012970	Clust-UGC0002122	9025	33	1	0	1
UGC0010536	Clust-UGC0002122	5456	4	1	0	1
UGC0004952	Clust-UGC0002122	3787	3	1	0	1
UGC0004487	Clust-UGC0002122	7329	14	1	0	1
UGC0004954	Clust-UGC0002122	3728	3	1	0	1
UGC0004958	Clust-UGC0002122	913	1	0	0	0
UGC0005578	Clust-UGC0002122	1866	2	1	0	1
UGC0006888	Clust-UGC0002122	4734	3	1	0	1
UGC0007136	Clust-UGC0002122	2935	1	0	0	0
UGC0008469	Clust-UGC0002122	1822	2	1	0	1
UGC0004561	Clust-UGC0002122	3270	2	1	0	1
UGC0005962	Clust-UGC0002122	4541	3	1	0	1
UGC0002496	Clust-UGC0002122	267	1	0	0	0
UGC0006432	Clust-UGC0002122	3357	4	1	0	1
UGC0007221	Clust-UGC0002122	5282	4	1	0	1
UGC0010519	Clust-UGC0002122	3778	3	1	0	1
UGC0010510	Clust-UGC0002122	1716	1	0	0	0
UGC0008679	Clust-UGC0002122	2011	1	0	0	0
UGC0004977	Clust-UGC0002122	4068	2	1	0	1
UGC0013340	Clust-UGC0002122	854	2	1	0	1
UGC0012765	Clust-UGC0002122	1811	1	0	0	0
UGC0006601	Clust-UGC0002122	1698	2	1	0	1
UGC0008943	Clust-UGC0002122	5080	4	1	0	1
UGC0005753	Clust-UGC0002122	5600	6	1	0	1
UGC0005538	Clust-UGC0002122	1746	2	1	0	1
UGC0006848	Clust-UGC0002122	2695	1	0	0	0
UGC0007533	Clust-UGC0002122	4694	5	1	0	1
UGC0007530	Clust-UGC0002122	5919	3	1	0	1
UGC0008633	Clust-UGC0002122	2697	2	1	0	1
UGC0006737	Clust-UGC0002122	3728	3	1	0	1
UGC0005877	Clust-UGC0002122	2675	2	1	0	1
UGC0003792	Clust-UGC0002122	815	1	0	0	0
UGC0003791	Clust-UGC0002122	863	2	1	0	1
UGC0008395	Clust-UGC0002122	457	1	0	0	0
UGC0007768	Clust-UGC0002122	4006	3	1	0	1
UGC0002495	Clust-UGC0002122	387	1	0	0	0
UGC0005110	Clust-UGC0002122	1782	1	0	0	0
UGC0012014	Clust-UGC0002122	814	1	0	0	0
UGC0007510	Clust-UGC0002122	6379	7	1	0	1
UGC0008186	Clust-UGC0002122	914	1	0	0	0
UGC0012206	Clust-UGC0002122	2294	3	1	0	0
UGC0008210	Clust-UGC0002122	829	1	0	0	0
UGC0003240	Clust-UGC0002122	4877	3	1	0	1
UGC0002125	Clust-UGC0002122	2785	2	1	0	0
UGC0002122	Clust-UGC0002122	4102	3	1	0	1
UGC0004665	Clust-UGC0002122	10390	49	1	0	1
UGC0003364	Clust-UGC0002122	9016	29	1	0	1
UGC0012694	Clust-UGC0002122	4683	4	1	0	1
UGC0007748	Clust-UGC0002122	3201	2	1	0	1
UGC0008232	Clust-UGC0002122	923	1	0	0	0
UGC0004467	Clust-UGC0002122	6235	17	1	0	1
UGC0006171	Clust-UGC0002122	2057	1	0	0	0
UGC0007086	Clust-UGC0002122	2972	2	1	0	1
UGC0005814	Clust-UGC0002122	4402	2	1	0	1
UGC0008256	Clust-UGC0002122	611	1	0	0	0
UGC0005720	Clust-UGC0002122	5060	3	1	0	1
UGC0008613	Clust-UGC0002124	5058	3	1	0	1
UGC0012176	Clust-UGC0002124	7053	3	1	0	1
UGC0007490	Clust-UGC0002124	8988	9	1	0	1
UGC0008290	Clust-UGC0002124	1875	1	0	0	0
UGC0002993	Clust-UGC0002124	1295	1	0	0	0
UGC0006293	Clust-UGC0002124	7101	5	1	0	1
UGC0011138	Clust-UGC0002124	537	2	1	0	0
UGC0005405	Clust-UGC0002124	4935	2	1	0	1
UGC0006691	Clust-UGC0002124	1591	4	1	0	0
UGC0002374	Clust-UGC0002124	3493	1	0	0	0
UGC0006276	Clust-UGC0002124	6412	4	1	0	1
UGC0006768	Clust-UGC0002124	6789	2	1	0	0
UGC0007363	Clust-UGC0002124	3888	1	0	0	0
UGC0007366	Clust-UGC0002124	6493	3	1	0	1
UGC0006915	Clust-UGC0002124	766	1	0	0	0
UGC0005387	Clust-UGC0002124	3639	2	1	0	1
UGC0005032	Clust-UGC0002124	12167	12	1	0	1
UGC0012732	Clust-UGC0002124	1429	1	0	0	0
UGC0012883	Clust-UGC0002124	10996	9	1	0	1
UGC0009453	Clust-UGC0002124	5582	2	1	0	1
UGC0007321	Clust-UGC0002124	750	1	0	0	0
UGC0002520	Clust-UGC0002124	3806	2	1	0	1
UGC0007463	Clust-UGC0002124	3507	1	0	0	0
UGC0006619	Clust-UGC0002124	265	1	0	0	0
UGC0008065	Clust-UGC0002124	5918	3	1	0	1
UGC0002149	Clust-UGC0002124	13032	16	1	0	1
UGC0002548	Clust-UGC0002124	3922	1	0	0	0
UGC0009604	Clust-UGC0002124	4746	3	1	0	1
UGC0010775	Clust-UGC0002124	63	1	0	0	0
UGC0006105	Clust-UGC0002124	2460	1	0	0	0
UGC0012950	Clust-UGC0002124	3776	2	1	0	1
UGC0009341	Clust-UGC0002124	9082	3	1	0	1
UGC0006349	Clust-UGC0002124	7126	5	1	0	1
UGC0012988	Clust-UGC0002124	1685	1	0	0	0
UGC0012981	Clust-UGC0002124	4680	1	0	0	0
UGC0006369	Clust-UGC0002124	11826	18	1	0	1
UGC0004842	Clust-UGC0002124	6152	2	1	0	1
UGC0013144	Clust-UGC0002124	162	1	0	0	0
UGC0009684	Clust-UGC0002124	1991	1	0	0	0
UGC0010949	Clust-UGC0002124	6921	5	1	0	1
UGC0005969	Clust-UGC0002124	4003	1	0	0	0
UGC0010153	Clust-UGC0002124	5672	2	1	0	1
UGC0004795	Clust-UGC0002124	5703	3	1	0	1
UGC0010451	Clust-UGC0002124	5378	3	1	1	1
UGC0010452	Clust-UGC0002124	5737	2	1	0	1
UGC0003755	Clust-UGC0002124	281	1	0	0	0
UGC0011558	Clust-UGC0002124	8250	5	1	1	1
UGC0008899	Clust-UGC0002124	2667	1	0	0	0
UGC0013234	Clust-UGC0002124	4271	1	0	0	0
UGC0008713	Clust-UGC0002124	234	1	0	0	0
UGC0008617	Clust-UGC0002124	4589	3	1	0	0
UGC0005757	Clust-UGC0002124	6740	3	1	0	0
UGC0009461	Clust-UGC0002124	7178	3	1	0	1
UGC0011439	Clust-UGC0002124	5368	4	1	0	0
UGC0010812	Clust-UGC0002124	1735	5	1	0	0
UGC0009481	Clust-UGC0002124	5067	3	1	0	1
UGC0011010	Clust-UGC0002124	3894	2	1	0	1
UGC0011817	Clust-UGC0002124	4826	5	1	0	1
UGC0007138	Clust-UGC0002124	3102	2	1	0	1
UGC0006628	Clust-UGC0002124	1200	1	0	0	0
UGC0006622	Clust-UGC0002124	4262	2	1	0	1
UGC0009214	Clust-UGC0002124	2064	2	1	0	0
UGC0009981	Clust-UGC0002124	3986	3	1	0	1
UGC0004978	Clust-UGC0002124	9504	6	1	0	1
UGC0004602	Clust-UGC0002124	3044	1	0	0	0
UGC0010891	Clust-UGC0002124	3429	1	0	0	0
UGC0007944	Clust-UGC0002124	6253	3	1	0	1
UGC0012011	Clust-UGC0002124	7468	2	1	0	1
UGC0002124	Clust-UGC0002124	3056	2	1	0	0
UGC0006802	Clust-UGC0002124	4639	1	0	0	0
UGC0004661	Clust-UGC0002124	3461	2	1	0	1
UGC0007572	Clust-UGC0002124	7174	4	1	0	1
UGC0006450	Clust-UGC0002126	10724	61	1	1	1
UGC0011171	Clust-UGC0002126	3372	4	1	0	1
UGC0012753	Clust-UGC0002126	1562	2	1	0	1
UGC0005918	Clust-UGC0002126	4447	7	1	0	1
UGC0002295	Clust-UGC0002126	9737	36	1	0	1
UGC0002290	Clust-UGC0002126	6110	3	1	0	1
UGC0012613	Clust-UGC0002126	11580	74	1	0	1
UGC0012114	Clust-UGC0002126	3277	3	1	0	1
UGC0006278	Clust-UGC0002126	5500	9	1	0	1
UGC0012035	Clust-UGC0002126	959	1	0	0	0
UGC0010804	Clust-UGC0002126	8597	26	1	0	1
UGC0003746	Clust-UGC0002126	576	1	0	0	0
UGC0005774	Clust-UGC0002126	10754	49	1	0	1
UGC0010549	Clust-UGC0002126	7982	16	1	0	1
UGC0010520	Clust-UGC0002126	5836	2	1	0	1
UGC0008501	Clust-UGC0002126	4180	2	1	0	1
UGC0010864	Clust-UGC0002126	161	1	0	0	0
UGC0009086	Clust-UGC0002126	1016	2	1	0	1
UGC0009080	Clust-UGC0002126	1483	2	1	0	1
UGC0012024	Clust-UGC0002126	2942	2	1	0	1
UGC0005923	Clust-UGC0002126	1075	2	1	0	1
UGC0012008	Clust-UGC0002126	2815	4	1	0	1
UGC0006380	Clust-UGC0002126	7482	24	1	0	1
UGC0006817	Clust-UGC0002126	10838	54	1	0	1
UGC0006348	Clust-UGC0002126	12054	73	1	0	1
UGC0011182	Clust-UGC0002126	511	2	1	0	0
UGC0006363	Clust-UGC0002126	7108	21	1	0	1
UGC0006143	Clust-UGC0002126	1163	1	0	0	0
UGC0007895	Clust-UGC0002126	10005	57	1	0	1
UGC0006044	Clust-UGC0002126	6172	7	1	0	1
UGC0006288	Clust-UGC0002126	1844	2	1	0	1
UGC0005885	Clust-UGC0002126	4540	3	1	0	1
UGC0012127	Clust-UGC0002126	7290	19	1	1	1
UGC0013000	Clust-UGC0002126	2117	1	0	0	0
UGC0008550	Clust-UGC0002126	1521	2	1	0	1
UGC0010857	Clust-UGC0002126	7502	19	1	0	1
UGC0011996	Clust-UGC0002126	1342	1	0	0	0
UGC0011999	Clust-UGC0002126	3049	4	1	0	1
UGC0005926	Clust-UGC0002126	3892	5	1	0	1
UGC0008821	Clust-UGC0002126	4635	2	1	0	1
UGC0009425	Clust-UGC0002126	3853	1	0	0	0
UGC0002242	Clust-UGC0002126	15120	116	1	0	1
UGC0006087	Clust-UGC0002126	6766	10	1	0	1
UGC0010851	Clust-UGC0002126	5532	8	1	0	1
UGC0009213	Clust-UGC0002126	2334	4	1	0	0
UGC0006458	Clust-UGC0002126	5776	7	1	0	1
UGC0006843	Clust-UGC0002126	7025	9	1	0	1
UGC0006399	Clust-UGC0002126	7410	15	1	1	1
UGC0009630	Clust-UGC0002126	3585	1	0	0	0
UGC0012208	Clust-UGC0002126	11645	66	1	0	1
UGC0002126	Clust-UGC0002126	8680	18	1	0	1
UGC0006806	Clust-UGC0002126	6661	7	1	0	1
UGC0005830	Clust-UGC0002126	3382	1	0	0	0
UGC0012442	Clust-UGC0002126	6191	4	1	0	1
UGC0008355	Clust-UGC0002126	2134	2	1	0	1
UGC0011961	Clust-UGC0002126	4007	2	1	0	1
UGC0006155	Clust-UGC0002126	2027	2	1	0	1
UGC0010636	Clust-UGC0002129	1167	1	0	0	0
UGC0013178	Clust-UGC0002129	1345	1	0	0	0
UGC0003009	Clust-UGC0002129	908	1	0	0	0
UGC0004826	Clust-UGC0002129	7491	8	1	0	1
UGC0008743	Clust-UGC0002129	1081	1	0	0	0
UGC0006093	Clust-UGC0002129	1951	1	0	0	0
UGC0006164	Clust-UGC0002129	1510	1	0	0	0
UGC0005959	Clust-UGC0002129	2049	2	1	0	1
UGC0005656	Clust-UGC0002129	636	1	0	0	0
UGC0006307	Clust-UGC0002129	4642	3	1	0	1
UGC0005642	Clust-UGC0002129	2857	1	0	0	0
UGC0011457	Clust-UGC0002129	11106	24	1	0	1
UGC0010232	Clust-UGC0002129	542	1	0	0	0
UGC0009016	Clust-UGC0002129	1388	2	1	1	0
UGC0004520	Clust-UGC0002129	2799	1	0	0	0
UGC0008586	Clust-UGC0002129	3702	2	1	0	1
UGC0009093	Clust-UGC0002129	294	1	0	0	0
UGC0008458	Clust-UGC0002129	1207	1	0	0	0
UGC0009178	Clust-UGC0002129	3053	2	1	0	1
UGC0003022	Clust-UGC0002129	1086	1	0	0	0
UGC0007237	Clust-UGC0002129	4541	4	1	0	1
UGC0002129	Clust-UGC0002129	4271	3	1	0	1
UGC0006356	Clust-UGC0002129	4475	4	1	0	1
UGC0006154	Clust-UGC0002129	2362	1	0	0	0
UGC0013240	Clust-UGC0002131	1341	1	0	0	0
UGC0010505	Clust-UGC0002131	2416	7	1	1	1
UGC0005862	Clust-UGC0002131	1605	3	1	0	1
UGC0005106	Clust-UGC0002131	1808	2	1	0	0
UGC0002131	Clust-UGC0002131	3617	9	1	0	1
UGC0005121	Clust-UGC0002131	997	2	1	0	0
UGC0005809	Clust-UGC0002131	6873	13	1	0	1
UGC0005600	Clust-UGC0002131	614	3	1	0	1
UGC0012221	Clust-UGC0002131	7455	16	1	0	1
UGC0008649	Clust-UGC0002131	809	2	1	0	0
UGC0004993	Clust-UGC0002131	4842	5	1	0	0
UGC0008659	Clust-UGC0002131	2550	6	1	0	1
UGC0008477	Clust-UGC0002131	892	1	0	0	0
UGC0007723	Clust-UGC0002131	4327	11	1	0	1
UGC0006820	Clust-UGC0002131	547	1	0	0	0
UGC0011507	Clust-UGC0002131	6950	7	1	0	1
UGC0008275	Clust-UGC0002132	1208	1	0	0	0
UGC0008864	Clust-UGC0002132	1839	1	0	0	0
UGC0009198	Clust-UGC0002132	5906	2	1	0	1
UGC0008483	Clust-UGC0002132	1086	1	0	0	0
UGC0005997	Clust-UGC0002132	177	1	0	0	0
UGC0002332	Clust-UGC0002132	2185	1	0	0	0
UGC0013175	Clust-UGC0002132	248	1	0	0	0
UGC0013170	Clust-UGC0002132	1999	1	0	0	0
UGC0007671	Clust-UGC0002132	5919	3	1	0	1
UGC0004129	Clust-UGC0002132	238	1	0	0	0
UGC0004120	Clust-UGC0002132	1676	1	0	0	0
UGC0012633	Clust-UGC0002132	3049	2	1	0	0
UGC0008603	Clust-UGC0002132	5074	2	1	0	0
UGC0012868	Clust-UGC0002132	8195	6	1	0	1
UGC0008884	Clust-UGC0002132	3752	1	0	0	0
UGC0008573	Clust-UGC0002132	4435	2	1	0	1
UGC0013387	Clust-UGC0002132	1850	2	1	0	0
UGC0007401	Clust-UGC0002132	930	1	0	0	0
UGC0011986	Clust-UGC0002132	1584	1	0	0	0
UGC0009241	Clust-UGC0002132	12064	22	1	0	1
UGC0007420	Clust-UGC0002132	173	1	0	0	0
UGC0008026	Clust-UGC0002132	6974	6	1	0	1
UGC0012574	Clust-UGC0002132	8329	6	1	0	1
UGC0009993	Clust-UGC0002132	2287	1	0	0	0
UGC0013371	Clust-UGC0002132	3072	2	1	0	0
UGC0013374	Clust-UGC0002132	1888	2	1	0	0
UGC0012596	Clust-UGC0002132	5861	2	1	0	0
UGC0009221	Clust-UGC0002132	9605	9	1	0	1
UGC0003369	Clust-UGC0002132	5145	5	1	0	1
UGC0012901	Clust-UGC0002132	5986	3	1	0	0
UGC0006469	Clust-UGC0002132	4621	2	1	0	1
UGC0013353	Clust-UGC0002132	5113	3	1	0	1
UGC0013351	Clust-UGC0002132	312	2	1	0	0
UGC0008040	Clust-UGC0002132	2147	1	0	0	0
UGC0008604	Clust-UGC0002132	7081	1	0	0	0
UGC0009601	Clust-UGC0002132	1637	1	0	0	0
UGC0008601	Clust-UGC0002132	7722	2	1	0	1
UGC0009478	Clust-UGC0002132	251	1	0	0	0
UGC0008626	Clust-UGC0002132	4062	2	1	0	1
UGC0008846	Clust-UGC0002132	233	1	0	0	0
UGC0008368	Clust-UGC0002132	222	1	0	0	0
UGC0009713	Clust-UGC0002132	3364	1	0	0	0
UGC0002155	Clust-UGC0002132	3104	2	1	0	0
UGC0009102	Clust-UGC0002132	1698	1	0	0	0
UGC0012682	Clust-UGC0002132	9908	12	1	2	1
UGC0005826	Clust-UGC0002132	5983	6	1	1	1
UGC0008346	Clust-UGC0002132	684	1	0	0	0
UGC0012610	Clust-UGC0002132	6235	2	1	0	0
UGC0002137	Clust-UGC0002132	1954	2	1	0	0
UGC0007954	Clust-UGC0002132	858	1	0	0	0
UGC0007951	Clust-UGC0002132	3526	3	1	0	1
UGC0006577	Clust-UGC0002132	3108	1	0	0	0
UGC0008222	Clust-UGC0002132	856	1	0	0	0
UGC0008326	Clust-UGC0002132	1109	2	1	0	0
UGC0009491	Clust-UGC0002132	4591	3	1	0	0
UGC0007894	Clust-UGC0002132	3601	4	1	0	0
UGC0007891	Clust-UGC0002132	3398	2	1	0	0
UGC0010173	Clust-UGC0002132	2112	1	0	0	0
UGC0008300	Clust-UGC0002132	1043	1	0	0	0
UGC0009307	Clust-UGC0002132	278	1	0	0	0
UGC0008491	Clust-UGC0002132	1637	1	0	0	0
UGC0013167	Clust-UGC0002132	306	1	0	0	0
UGC0007912	Clust-UGC0002132	7171	5	1	0	1
UGC0007916	Clust-UGC0002132	694	1	0	0	0
UGC0009187	Clust-UGC0002132	7025	7	1	0	1
UGC0012603	Clust-UGC0002132	8511	7	1	0	1
UGC0012834	Clust-UGC0002132	4407	3	1	0	1
UGC0012336	Clust-UGC0002132	633	1	0	0	0
UGC0004750	Clust-UGC0002132	322	1	0	0	0
UGC0013215	Clust-UGC0002132	7323	3	1	0	1
UGC0004134	Clust-UGC0002132	1462	1	0	0	0
UGC0007011	Clust-UGC0002132	2550	2	1	0	1
UGC0002132	Clust-UGC0002132	3533	3	1	0	1
UGC0012870	Clust-UGC0002132	8799	4	1	0	1
UGC0008173	Clust-UGC0002132	1181	1	0	0	0
UGC0007991	Clust-UGC0002132	287	1	0	0	0
UGC0011990	Clust-UGC0002132	3381	1	0	0	0
UGC0008922	Clust-UGC0002132	1280	1	0	0	0
UGC0009251	Clust-UGC0002132	10451	12	1	0	1
UGC0009075	Clust-UGC0002132	3328	1	0	0	0
UGC0009072	Clust-UGC0002132	2999	1	0	0	0
UGC0007788	Clust-UGC0002132	3077	3	1	0	1
UGC0010834	Clust-UGC0002132	1380	1	0	0	0
UGC0012896	Clust-UGC0002132	230	1	0	0	0
UGC0008903	Clust-UGC0002132	850	1	0	0	0
UGC0012976	Clust-UGC0002132	6549	3	1	0	1
UGC0013362	Clust-UGC0002132	554	2	1	0	0
UGC0013364	Clust-UGC0002132	2292	3	1	0	1
UGC0006084	Clust-UGC0002132	5288	3	1	0	1
UGC0004564	Clust-UGC0002132	8193	10	1	0	1
UGC0006438	Clust-UGC0002132	5111	1	0	0	0
UGC0008581	Clust-UGC0002132	4943	3	1	0	1
UGC0009984	Clust-UGC0002132	1319	1	0	0	0
UGC0009980	Clust-UGC0002132	752	1	0	0	0
UGC0009407	Clust-UGC0002132	462	1	0	0	0
UGC0012589	Clust-UGC0002132	5419	3	1	0	1
UGC0003795	Clust-UGC0002132	827	1	0	0	0
UGC0009235	Clust-UGC0002132	6818	4	1	0	1
UGC0008942	Clust-UGC0002132	6665	3	1	0	1
UGC0009094	Clust-UGC0002132	3187	2	1	0	1
UGC0004623	Clust-UGC0002132	7291	4	1	1	1
UGC0004627	Clust-UGC0002132	4136	4	1	0	1
UGC0008424	Clust-UGC0002132	417	1	0	0	0
UGC0007955	Clust-UGC0002132	2206	1	0	0	0
UGC0007947	Clust-UGC0002132	2435	1	0	0	0
UGC0009115	Clust-UGC0002132	1127	1	0	0	0
UGC0008188	Clust-UGC0002132	1027	1	0	0	0
UGC0012205	Clust-UGC0002132	5590	2	1	0	0
UGC0005834	Clust-UGC0002132	3670	1	0	0	0
UGC0013114	Clust-UGC0002132	1289	1	0	0	0
UGC0003731	Clust-UGC0002132	493	1	0	0	0
UGC0010971	Clust-UGC0002132	3624	3	1	0	1
UGC0009330	Clust-UGC0002132	3492	3	1	0	1
UGC0003418	Clust-UGC0002132	1065	1	0	0	0
UGC0013136	Clust-UGC0002132	267	1	0	0	0
UGC0007766	Clust-UGC0002132	3604	5	1	0	0
UGC0008338	Clust-UGC0002132	383	1	0	0	0
UGC0008332	Clust-UGC0002132	682	1	0	0	0
UGC0010167	Clust-UGC0002133	2473	1	0	0	0
UGC0006064	Clust-UGC0002133	1428	1	0	0	0
UGC0012172	Clust-UGC0002133	4102	2	1	0	1
UGC0010282	Clust-UGC0002133	2602	3	1	0	1
UGC0003764	Clust-UGC0002133	229	1	0	0	0
UGC0003238	Clust-UGC0002133	2835	4	1	0	1
UGC0006897	Clust-UGC0002133	2270	2	1	0	1
UGC0012964	Clust-UGC0002133	5672	9	1	0	1
UGC0007108	Clust-UGC0002133	472	1	0	0	0
UGC0006679	Clust-UGC0002133	1023	2	1	0	1
UGC0006335	Clust-UGC0002133	4713	5	1	0	1
UGC0009687	Clust-UGC0002133	660	1	0	0	0
UGC0009189	Clust-UGC0002133	124	1	0	0	0
UGC0008859	Clust-UGC0002133	2285	3	1	0	1
UGC0010988	Clust-UGC0002133	1281	3	1	0	1
UGC0003546	Clust-UGC0002133	3635	4	1	0	1
UGC0002133	Clust-UGC0002133	1456	5	1	0	1
UGC0010003	Clust-UGC0002133	360	1	0	0	0
UGC0007335	Clust-UGC0002133	1657	1	0	0	0
UGC0010492	Clust-UGC0002133	5222	8	1	1	1
UGC0003276	Clust-UGC0002133	8357	20	1	0	1
UGC0010858	Clust-UGC0002133	1284	1	0	0	0
UGC0008678	Clust-UGC0002133	350	1	0	0	0
UGC0006801	Clust-UGC0002133	4152	4	1	0	1
UGC0008231	Clust-UGC0002133	887	3	1	0	1
UGC0002134	Clust-UGC0002134	1050	1	0	0	0
UGC0002136	Clust-UGC0002136	5935	22	1	0	1
UGC0011563	Clust-UGC0002139	12463	86	1	0	1
UGC0013171	Clust-UGC0002139	2367	2	1	0	0
UGC0004593	Clust-UGC0002139	10060	40	1	0	1
UGC0005356	Clust-UGC0002139	2462	2	1	0	1
UGC0011902	Clust-UGC0002139	3047	1	0	0	0
UGC0003767	Clust-UGC0002139	421	1	0	0	0
UGC0012632	Clust-UGC0002139	2264	2	1	0	0
UGC0010095	Clust-UGC0002139	4104	4	1	0	1
UGC0009544	Clust-UGC0002139	2725	4	1	0	0
UGC0008702	Clust-UGC0002139	534	1	0	0	0
UGC0011449	Clust-UGC0002139	10843	32	1	0	1
UGC0007635	Clust-UGC0002139	3139	1	0	0	0
UGC0012797	Clust-UGC0002139	2884	3	1	0	1
UGC0005617	Clust-UGC0002139	4223	1	0	0	0
UGC0007341	Clust-UGC0002139	993	2	1	0	0
UGC0008524	Clust-UGC0002139	1357	1	0	0	0
UGC0002324	Clust-UGC0002139	3318	2	1	0	1
UGC0008936	Clust-UGC0002139	178	1	0	0	0
UGC0013052	Clust-UGC0002139	5924	7	1	2	1
UGC0009066	Clust-UGC0002139	5453	6	1	0	1
UGC0007790	Clust-UGC0002139	4330	3	1	0	1
UGC0004535	Clust-UGC0002139	4924	7	1	0	1
UGC0005958	Clust-UGC0002139	62	1	0	0	0
UGC0004945	Clust-UGC0002139	4411	2	1	0	1
UGC0005541	Clust-UGC0002139	736	1	0	0	0
UGC0005547	Clust-UGC0002139	427	1	0	0	0
UGC0006894	Clust-UGC0002139	6284	8	1	0	1
UGC0013375	Clust-UGC0002139	129	2	1	0	0
UGC0012770	Clust-UGC0002139	2795	2	1	0	1
UGC0010196	Clust-UGC0002139	497	2	1	1	0
UGC0005736	Clust-UGC0002139	4041	8	1	0	1
UGC0008938	Clust-UGC0002139	7124	12	1	0	1
UGC0011820	Clust-UGC0002139	4641	3	1	0	0
UGC0008430	Clust-UGC0002139	1356	1	0	0	0
UGC0008045	Clust-UGC0002139	129	1	0	0	0
UGC0009167	Clust-UGC0002139	3584	3	1	0	1
UGC0008363	Clust-UGC0002139	2055	1	0	0	0
UGC0004677	Clust-UGC0002139	19425	164	1	0	1
UGC0010351	Clust-UGC0002139	62	1	0	0	0
UGC0007978	Clust-UGC0002139	938	1	0	0	0
UGC0008207	Clust-UGC0002139	2522	2	1	0	1
UGC0008340	Clust-UGC0002139	797	1	0	0	0
UGC0002139	Clust-UGC0002139	4496	3	1	0	1
UGC0010960	Clust-UGC0002139	374	2	1	0	0
UGC0012983	Clust-UGC0002139	6107	9	1	0	1
UGC0010580	Clust-UGC0002139	2044	2	1	0	1
UGC0008796	Clust-UGC0002139	3544	1	0	0	0
UGC0008876	Clust-UGC0002139	6824	14	1	0	1
UGC0011956	Clust-UGC0002139	296	1	0	0	0
UGC0008497	Clust-UGC0002139	2483	3	1	0	0
UGC0007445	Clust-UGC0002139	922	1	0	0	0
UGC0006519	Clust-UGC0002139	2001	1	0	0	0
UGC0010086	Clust-UGC0002139	3132	1	0	0	0
UGC0005663	Clust-UGC0002139	3957	3	1	0	1
UGC0005415	Clust-UGC0002139	2743	1	0	0	0
UGC0005602	Clust-UGC0002139	3165	1	0	0	0
UGC0007037	Clust-UGC0002139	2526	1	0	0	0
UGC0008529	Clust-UGC0002139	712	1	0	0	0
UGC0008647	Clust-UGC0002139	1129	1	0	0	0
UGC0010579	Clust-UGC0002139	1573	3	1	1	0
UGC0011438	Clust-UGC0002139	2384	3	1	0	0
UGC0010219	Clust-UGC0002139	599	2	1	0	0
UGC0005680	Clust-UGC0002139	266	1	0	0	0
UGC0005519	Clust-UGC0002139	768	1	0	0	0
UGC0006608	Clust-UGC0002139	2295	1	0	0	0
UGC0012911	Clust-UGC0002139	4464	4	1	0	1
UGC0009618	Clust-UGC0002139	1259	1	0	0	0
UGC0007707	Clust-UGC0002139	8560	19	1	0	1
UGC0011685	Clust-UGC0002139	3670	3	1	0	1
UGC0003609	Clust-UGC0002139	2454	1	0	0	0
UGC0007724	Clust-UGC0002139	8190	30	1	0	1
UGC0008667	Clust-UGC0002139	102	1	0	0	0
UGC0012202	Clust-UGC0002139	6152	12	1	0	1
UGC0005327	Clust-UGC0002139	2742	1	0	0	0
UGC0008216	Clust-UGC0002139	8824	38	1	0	1
UGC0008372	Clust-UGC0002139	668	1	0	0	0
UGC0012195	Clust-UGC0002139	9171	38	1	0	1
UGC0010594	Clust-UGC0002139	2463	3	1	0	1
UGC0009339	Clust-UGC0002139	5345	7	1	0	1
UGC0006828	Clust-UGC0002139	3946	3	1	0	1
UGC0008504	Clust-UGC0002139	415	1	0	0	0
UGC0006373	Clust-UGC0002139	5700	7	1	0	1
UGC0007207	Clust-UGC0002142	5343	2	1	0	0
UGC0006550	Clust-UGC0002142	2869	1	0	0	0
UGC0004166	Clust-UGC0002142	1203	1	0	0	0
UGC0004162	Clust-UGC0002142	2460	1	0	0	0
UGC0008270	Clust-UGC0002142	857	1	0	0	0
UGC0005373	Clust-UGC0002142	3688	2	1	0	1
UGC0008299	Clust-UGC0002142	3490	1	0	0	0
UGC0002294	Clust-UGC0002142	6456	5	1	0	0
UGC0012323	Clust-UGC0002142	1219	1	0	0	0
UGC0011674	Clust-UGC0002142	4380	2	1	0	1
UGC0012796	Clust-UGC0002142	1933	1	0	0	0
UGC0008889	Clust-UGC0002142	5396	2	1	0	1
UGC0007286	Clust-UGC0002142	5805	2	1	0	1
UGC0006739	Clust-UGC0002142	559	1	0	0	0
UGC0007345	Clust-UGC0002142	4778	2	1	0	0
UGC0008516	Clust-UGC0002142	1895	1	0	0	0
UGC0008518	Clust-UGC0002142	1607	1	0	0	0
UGC0007403	Clust-UGC0002142	4531	1	0	0	0
UGC0013242	Clust-UGC0002142	4287	3	1	2	0
UGC0003232	Clust-UGC0002142	3224	4	1	0	1
UGC0007367	Clust-UGC0002142	2413	1	0	0	0
UGC0013053	Clust-UGC0002142	7769	8	1	0	1
UGC0010826	Clust-UGC0002142	12507	25	1	0	1
UGC0010827	Clust-UGC0002142	6814	1	0	0	0
UGC0012553	Clust-UGC0002142	3681	3	1	0	1
UGC0007143	Clust-UGC0002142	4016	2	1	0	1
UGC0007326	Clust-UGC0002142	906	1	0	0	0
UGC0007462	Clust-UGC0002142	4302	1	0	0	0
UGC0009435	Clust-UGC0002142	96	1	0	0	0
UGC0007129	Clust-UGC0002142	759	1	0	0	0
UGC0007693	Clust-UGC0002142	4043	2	1	0	0
UGC0006614	Clust-UGC0002142	358	1	0	0	0
UGC0004573	Clust-UGC0002142	10199	11	1	0	1
UGC0008382	Clust-UGC0002142	457	1	0	0	0
UGC0004659	Clust-UGC0002142	1661	1	0	0	0
UGC0013335	Clust-UGC0002142	421	1	0	0	0
UGC0009164	Clust-UGC0002142	3254	5	1	0	1
UGC0011208	Clust-UGC0002142	7970	4	1	0	1
UGC0007526	Clust-UGC0002142	8726	3	1	0	1
UGC0003254	Clust-UGC0002142	10171	12	1	0	1
UGC0003283	Clust-UGC0002142	456	1	0	0	0
UGC0007758	Clust-UGC0002142	6214	8	1	0	1
UGC0007759	Clust-UGC0002142	2554	1	0	0	0
UGC0006830	Clust-UGC0002142	8175	7	1	1	1
UGC0003265	Clust-UGC0002142	9870	8	1	0	1
UGC0012047	Clust-UGC0002142	2754	1	0	0	0
UGC0012049	Clust-UGC0002142	3832	1	0	0	0
UGC0006144	Clust-UGC0002142	1391	1	0	0	0
UGC0007899	Clust-UGC0002142	7469	5	1	0	1
UGC0013145	Clust-UGC0002142	1656	2	1	0	0
UGC0008877	Clust-UGC0002142	4596	1	0	0	0
UGC0007211	Clust-UGC0002142	1945	1	0	0	0
UGC0007210	Clust-UGC0002142	2616	2	1	1	0
UGC0012608	Clust-UGC0002142	6769	3	1	0	1
UGC0013184	Clust-UGC0002142	4778	3	1	1	1
UGC0007016	Clust-UGC0002142	6442	3	1	1	0
UGC0011899	Clust-UGC0002142	4504	3	1	1	1
UGC0007290	Clust-UGC0002142	8928	5	1	0	1
UGC0003268	Clust-UGC0002142	8109	3	1	0	0
UGC0007965	Clust-UGC0002142	2228	1	0	0	0
UGC0006696	Clust-UGC0002142	5684	2	1	0	0
UGC0007196	Clust-UGC0002142	2242	2	1	0	0
UGC0013069	Clust-UGC0002142	16801	71	1	0	1
UGC0013088	Clust-UGC0002142	2563	2	1	1	0
UGC0007417	Clust-UGC0002142	4163	4	1	0	1
UGC0010757	Clust-UGC0002142	2086	1	0	0	0
UGC0008752	Clust-UGC0002142	1538	1	0	0	0
UGC0007314	Clust-UGC0002142	6617	3	1	1	1
UGC0008929	Clust-UGC0002142	3758	1	0	0	0
UGC0013049	Clust-UGC0002142	10074	7	1	0	1
UGC0009982	Clust-UGC0002142	5874	4	1	0	1
UGC0008611	Clust-UGC0002142	6475	3	1	0	1
UGC0007393	Clust-UGC0002142	1708	1	0	0	0
UGC0012601	Clust-UGC0002142	8567	5	1	0	1
UGC0003249	Clust-UGC0002142	7817	6	1	0	1
UGC0007940	Clust-UGC0002142	2357	2	1	0	0
UGC0002142	Clust-UGC0002142	5476	2	1	0	0
UGC0003606	Clust-UGC0002142	11631	13	1	0	1
UGC0007720	Clust-UGC0002142	7082	7	1	0	1
UGC0010918	Clust-UGC0002142	821	1	0	0	0
UGC0008370	Clust-UGC0002142	1728	1	0	0	0
UGC0003362	Clust-UGC0002142	323	1	0	0	0
UGC0007575	Clust-UGC0002142	5446	1	0	0	0
UGC0003263	Clust-UGC0002142	10564	11	1	0	1
UGC0011963	Clust-UGC0002142	743	1	0	0	0
UGC0007088	Clust-UGC0002142	3112	2	1	0	0
UGC0004148	Clust-UGC0002142	2100	1	0	0	0
UGC0005785	Clust-UGC0002144	5400	7	1	1	1
UGC0002352	Clust-UGC0002144	497	1	0	0	0
UGC0006588	Clust-UGC0002144	880	1	0	0	0
UGC0004494	Clust-UGC0002144	3933	4	1	0	1
UGC0007146	Clust-UGC0002144	2968	3	1	0	1
UGC0012595	Clust-UGC0002144	2607	3	1	0	1
UGC0002144	Clust-UGC0002144	1607	3	1	0	1
UGC0005842	Clust-UGC0002144	4735	2	1	0	1
UGC0005791	Clust-UGC0002144	5996	8	1	0	1
UGC0008267	Clust-UGC0002144	275	1	0	0	0
UGC0003750	Clust-UGC0002144	54	1	0	0	0
UGC0002286	Clust-UGC0002144	494	1	0	0	0
UGC0010859	Clust-UGC0002144	841	1	0	0	0
UGC0008927	Clust-UGC0002144	1315	1	0	0	0
UGC0002161	Clust-UGC0002144	3904	3	1	0	1
UGC0004789	Clust-UGC0002147	10372	139	1	0	1
UGC0012368	Clust-UGC0002147	19740	132	1	0	1
UGC0013176	Clust-UGC0002147	7286	17	1	0	1
UGC0011679	Clust-UGC0002147	12876	105	1	0	1
UGC0011655	Clust-UGC0002147	16764	161	1	0	1
UGC0002234	Clust-UGC0002147	12027	69	1	0	1
UGC0002238	Clust-UGC0002147	17008	162	1	0	1
UGC0002215	Clust-UGC0002147	217	1	0	0	0
UGC0002212	Clust-UGC0002147	22187	186	1	0	1
UGC0002251	Clust-UGC0002147	8500	88	1	0	1
UGC0003341	Clust-UGC0002147	18724	152	1	0	1
UGC0002147	Clust-UGC0002147	22610	183	1	0	1
UGC0012020	Clust-UGC0002147	5414	21	1	1	1
UGC0013101	Clust-UGC0002147	15050	95	1	0	1
UGC0013312	Clust-UGC0002147	11637	81	1	0	1
UGC0010969	Clust-UGC0002147	3958	10	1	0	1
UGC0002270	Clust-UGC0002147	1474	2	1	0	0
UGC0002259	Clust-UGC0002147	8067	23	1	0	1
UGC0002302	Clust-UGC0002147	11410	30	1	0	1
UGC0004798	Clust-UGC0002147	19000	208	1	0	1
UGC0012359	Clust-UGC0002147	15453	156	1	0	1
UGC0004775	Clust-UGC0002147	6536	35	1	0	1
UGC0013186	Clust-UGC0002147	7706	7	1	0	1
UGC0002280	Clust-UGC0002147	16156	155	1	0	1
UGC0002253	Clust-UGC0002147	13379	53	1	0	1
UGC0002220	Clust-UGC0002147	30539	254	1	0	1
UGC0002222	Clust-UGC0002147	23501	210	1	0	1
UGC0002228	Clust-UGC0002147	23392	221	1	0	1
UGC0011998	Clust-UGC0002147	9104	56	1	0	1
UGC0002208	Clust-UGC0002147	3111	15	1	0	1
UGC0002240	Clust-UGC0002147	19324	188	1	0	1
UGC0002249	Clust-UGC0002147	7167	48	1	0	1
UGC0002246	Clust-UGC0002147	24115	206	1	1	1
UGC0002243	Clust-UGC0002147	14689	151	1	0	1
UGC0013085	Clust-UGC0002147	8761	27	1	0	1
UGC0003378	Clust-UGC0002147	25307	225	1	0	1
UGC0002261	Clust-UGC0002147	13058	100	1	0	1
UGC0002262	Clust-UGC0002147	12737	137	1	0	1
UGC0013323	Clust-UGC0002147	9289	61	1	0	1
UGC0013328	Clust-UGC0002147	9295	44	1	0	1
UGC0010931	Clust-UGC0002147	7829	13	1	0	1
UGC0008377	Clust-UGC0002147	1574	2	1	0	1
UGC0012439	Clust-UGC0002147	14055	117	1	0	1
UGC0011944	Clust-UGC0002147	13115	74	1	0	1
UGC0008885	Clust-UGC0002148	4858	2	1	0	1
UGC0008004	Clust-UGC0002148	7095	4	1	0	1
UGC0004554	Clust-UGC0002148	7433	8	1	0	1
UGC0002148	Clust-UGC0002148	3193	2	1	0	0
UGC0005521	Clust-UGC0002148	1157	1	0	0	0
UGC0006871	Clust-UGC0002148	5060	2	1	0	1
UGC0008366	Clust-UGC0002148	768	1	0	0	0
UGC0010132	Clust-UGC0002148	6933	2	1	1	0
UGC0010117	Clust-UGC0002148	3009	1	0	0	0
UGC0008240	Clust-UGC0002148	989	1	0	0	0
UGC0002367	Clust-UGC0002148	665	2	1	1	0
UGC0010216	Clust-UGC0002148	489	1	0	0	0
UGC0010499	Clust-UGC0002148	4208	1	0	0	0
UGC0010124	Clust-UGC0002148	12558	13	1	1	1
UGC0005339	Clust-UGC0002148	907	1	0	0	0
UGC0008807	Clust-UGC0002148	2451	1	0	0	0
UGC0006556	Clust-UGC0002151	900	1	0	0	0
UGC0008272	Clust-UGC0002151	1101	1	0	0	0
UGC0008316	Clust-UGC0002151	2090	1	0	0	0
UGC0008865	Clust-UGC0002151	3478	1	0	0	0
UGC0005371	Clust-UGC0002151	2820	2	1	0	1
UGC0007042	Clust-UGC0002151	214	1	0	0	0
UGC0010464	Clust-UGC0002151	4085	1	0	0	0
UGC0007063	Clust-UGC0002151	906	1	0	0	0
UGC0007656	Clust-UGC0002151	6382	6	1	0	1
UGC0007001	Clust-UGC0002151	4011	1	0	0	0
UGC0006719	Clust-UGC0002151	899	1	0	0	0
UGC0007285	Clust-UGC0002151	4707	2	1	0	1
UGC0005909	Clust-UGC0002151	3833	2	1	0	1
UGC0008511	Clust-UGC0002151	2498	1	0	0	0
UGC0007409	Clust-UGC0002151	2530	1	0	0	0
UGC0002957	Clust-UGC0002151	1785	1	0	0	0
UGC0008533	Clust-UGC0002151	1153	1	0	0	0
UGC0009163	Clust-UGC0002151	2312	1	0	0	0
UGC0006876	Clust-UGC0002151	1432	1	0	0	0
UGC0006979	Clust-UGC0002151	3509	3	1	0	1
UGC0006790	Clust-UGC0002151	3299	2	1	0	1
UGC0009205	Clust-UGC0002151	5383	3	1	0	1
UGC0008530	Clust-UGC0002151	1672	1	0	0	0
UGC0008450	Clust-UGC0002151	746	1	0	0	0
UGC0008599	Clust-UGC0002151	3681	1	0	0	0
UGC0012021	Clust-UGC0002151	5059	4	1	0	1
UGC0008380	Clust-UGC0002151	3642	1	0	0	0
UGC0002176	Clust-UGC0002151	6633	4	1	0	1
UGC0009162	Clust-UGC0002151	5486	7	1	0	1
UGC0012009	Clust-UGC0002151	1140	1	0	0	0
UGC0008412	Clust-UGC0002151	1283	1	0	0	0
UGC0012275	Clust-UGC0002151	1513	1	0	0	0
UGC0008369	Clust-UGC0002151	1093	1	0	0	0
UGC0002151	Clust-UGC0002151	8022	6	1	0	1
UGC0010115	Clust-UGC0002151	7162	4	1	1	1
UGC0007953	Clust-UGC0002151	4214	1	0	0	0
UGC0008329	Clust-UGC0002151	1438	1	0	0	0
UGC0010589	Clust-UGC0002151	3301	1	0	0	0
UGC0007890	Clust-UGC0002151	6957	8	1	0	1
UGC0004158	Clust-UGC0002151	4369	3	1	0	1
UGC0007938	Clust-UGC0002151	3380	4	1	0	1
UGC0008498	Clust-UGC0002151	2658	1	0	0	0
UGC0008265	Clust-UGC0002151	2404	1	0	0	0
UGC0010458	Clust-UGC0002151	3033	1	0	0	0
UGC0007580	Clust-UGC0002151	8262	5	1	0	1
UGC0007974	Clust-UGC0002151	2909	1	0	0	0
UGC0007258	Clust-UGC0002151	6079	3	1	0	1
UGC0008548	Clust-UGC0002151	1031	1	0	0	0
UGC0010085	Clust-UGC0002151	7502	4	1	0	1
UGC0012814	Clust-UGC0002151	1895	1	0	0	0
UGC0011891	Clust-UGC0002151	15061	32	1	0	1
UGC0006838	Clust-UGC0002151	2174	1	0	0	0
UGC0011644	Clust-UGC0002151	4540	3	1	0	1
UGC0007967	Clust-UGC0002151	4390	4	1	0	1
UGC0007195	Clust-UGC0002151	646	1	0	0	0
UGC0008692	Clust-UGC0002151	1064	1	0	0	0
UGC0003277	Clust-UGC0002151	8021	7	1	0	1
UGC0010797	Clust-UGC0002151	783	2	1	0	0
UGC0002247	Clust-UGC0002151	12858	20	1	0	1
UGC0013082	Clust-UGC0002151	2866	1	0	0	0
UGC0007470	Clust-UGC0002151	4236	2	1	0	1
UGC0012582	Clust-UGC0002151	9283	18	1	0	1
UGC0008582	Clust-UGC0002151	1301	1	0	0	0
UGC0006840	Clust-UGC0002151	3912	2	1	0	1
UGC0006842	Clust-UGC0002151	4058	4	1	1	1
UGC0011145	Clust-UGC0002151	1469	2	1	0	1
UGC0009374	Clust-UGC0002151	6280	4	1	0	1
UGC0012698	Clust-UGC0002151	6457	7	1	0	1
UGC0007571	Clust-UGC0002151	7836	3	1	0	1
UGC0007743	Clust-UGC0002151	6860	5	1	0	1
UGC0006560	Clust-UGC0002151	1874	1	0	0	0
UGC0007889	Clust-UGC0002151	5368	4	1	0	1
UGC0007558	Clust-UGC0002151	5499	2	1	0	1
UGC0005782	Clust-UGC0002152	6605	3	1	0	1
UGC0006457	Clust-UGC0002152	7583	10	1	0	1
UGC0006452	Clust-UGC0002152	2207	1	0	0	0
UGC0011174	Clust-UGC0002152	2987	2	1	0	0
UGC0008271	Clust-UGC0002152	1153	1	0	0	0
UGC0008486	Clust-UGC0002152	937	1	0	0	0
UGC0005992	Clust-UGC0002152	4595	1	0	0	0
UGC0004106	Clust-UGC0002152	374	1	0	0	0
UGC0008298	Clust-UGC0002152	351	1	0	0	0
UGC0006337	Clust-UGC0002152	4073	4	1	0	1
UGC0006292	Clust-UGC0002152	4995	1	0	0	0
UGC0006075	Clust-UGC0002152	1884	1	0	0	0
UGC0005094	Clust-UGC0002152	2962	1	0	0	0
UGC0006013	Clust-UGC0002152	3395	1	0	0	0
UGC0007025	Clust-UGC0002152	5842	2	1	0	1
UGC0012022	Clust-UGC0002152	4288	1	0	0	0
UGC0013224	Clust-UGC0002152	349	1	0	0	0
UGC0011790	Clust-UGC0002152	1892	1	0	0	0
UGC0007404	Clust-UGC0002152	713	1	0	0	0
UGC0013246	Clust-UGC0002152	1396	1	0	0	0
UGC0013050	Clust-UGC0002152	3993	1	0	0	0
UGC0007160	Clust-UGC0002152	4245	2	1	0	1
UGC0010481	Clust-UGC0002152	5236	4	1	1	1
UGC0006976	Clust-UGC0002152	4276	2	1	1	0
UGC0006400	Clust-UGC0002152	4913	2	1	0	0
UGC0009433	Clust-UGC0002152	98	1	0	0	0
UGC0003599	Clust-UGC0002152	6214	1	0	0	0
UGC0005744	Clust-UGC0002152	3172	1	0	0	0
UGC0008042	Clust-UGC0002152	1740	1	0	0	0
UGC0003387	Clust-UGC0002152	4225	2	1	0	1
UGC0004657	Clust-UGC0002152	6073	2	1	0	1
UGC0005845	Clust-UGC0002152	6023	1	0	0	0
UGC0002152	Clust-UGC0002152	12925	5	1	1	1
UGC0005825	Clust-UGC0002152	8902	6	1	0	1
UGC0007753	Clust-UGC0002152	6140	1	0	0	0
UGC0006839	Clust-UGC0002152	8396	4	1	0	1
UGC0007567	Clust-UGC0002152	5517	3	1	0	1
UGC0006303	Clust-UGC0002152	5302	2	1	0	1
UGC0009724	Clust-UGC0002152	939	1	0	0	0
UGC0004119	Clust-UGC0002152	1220	1	0	0	0
UGC0002347	Clust-UGC0002152	532	1	0	0	0
UGC0005761	Clust-UGC0002152	6793	3	1	0	1
UGC0005946	Clust-UGC0002152	3369	1	0	0	0
UGC0011910	Clust-UGC0002152	6867	1	0	0	0
UGC0002289	Clust-UGC0002152	3896	1	0	0	0
UGC0006414	Clust-UGC0002152	6674	1	0	0	0
UGC0006067	Clust-UGC0002152	1091	1	0	0	0
UGC0012108	Clust-UGC0002152	889	1	0	0	0
UGC0011456	Clust-UGC0002152	3558	2	1	0	0
UGC0009765	Clust-UGC0002152	5855	2	1	0	1
UGC0006492	Clust-UGC0002152	1625	1	0	0	0
UGC0010025	Clust-UGC0002152	2428	1	0	0	0
UGC0012875	Clust-UGC0002152	9086	3	1	0	0
UGC0006020	Clust-UGC0002152	2082	1	0	0	0
UGC0006640	Clust-UGC0002152	1428	2	1	1	0
UGC0007376	Clust-UGC0002152	1645	1	0	0	0
UGC0011622	Clust-UGC0002152	8004	6	1	0	1
UGC0010747	Clust-UGC0002152	197	1	0	0	0
UGC0009250	Clust-UGC0002152	10558	5	1	0	1
UGC0009253	Clust-UGC0002152	11876	8	1	0	1
UGC0012541	Clust-UGC0002152	2880	2	1	0	0
UGC0012191	Clust-UGC0002152	5357	4	1	0	1
UGC0005579	Clust-UGC0002152	3445	3	1	0	1
UGC0006088	Clust-UGC0002152	1364	1	0	0	0
UGC0006439	Clust-UGC0002152	4223	4	1	0	1
UGC0009988	Clust-UGC0002152	1779	1	0	0	0
UGC0002972	Clust-UGC0002152	2293	1	0	0	0
UGC0005533	Clust-UGC0002152	1773	1	0	0	0
UGC0010914	Clust-UGC0002152	1644	1	0	0	0
UGC0005616	Clust-UGC0002152	3630	1	0	0	0
UGC0010599	Clust-UGC0002152	2354	1	0	0	0
UGC0004146	Clust-UGC0002152	1313	1	0	0	0
UGC0006376	Clust-UGC0002152	5631	2	1	0	1
UGC0002231	Clust-UGC0002156	10292	30	1	0	1
UGC0008383	Clust-UGC0002156	1773	3	1	0	0
UGC0002156	Clust-UGC0002156	4824	4	1	0	0
UGC0007666	Clust-UGC0002156	8545	27	1	0	1
UGC0002224	Clust-UGC0002156	12493	72	1	0	1
UGC0012973	Clust-UGC0002156	3466	3	1	0	1
UGC0006549	Clust-UGC0002156	2782	5	1	0	1
UGC0006527	Clust-UGC0002157	4003	3	1	0	1
UGC0008319	Clust-UGC0002157	1725	2	1	0	1
UGC0008866	Clust-UGC0002157	3025	1	0	0	0
UGC0007047	Clust-UGC0002157	2094	3	1	0	1
UGC0003724	Clust-UGC0002157	740	1	0	0	0
UGC0012287	Clust-UGC0002157	636	2	1	1	0
UGC0008512	Clust-UGC0002157	130	1	0	0	0
UGC0007632	Clust-UGC0002157	6110	4	1	0	1
UGC0012861	Clust-UGC0002157	14239	26	1	0	1
UGC0011886	Clust-UGC0002157	3811	1	0	0	0
UGC0005589	Clust-UGC0002157	3598	3	1	0	1
UGC0007183	Clust-UGC0002157	2256	1	0	0	0
UGC0005938	Clust-UGC0002157	4557	6	1	0	1
UGC0009718	Clust-UGC0002157	2165	2	1	0	0
UGC0007446	Clust-UGC0002157	5491	6	1	0	1
UGC0009458	Clust-UGC0002157	6230	7	1	0	1
UGC0012387	Clust-UGC0002157	2263	2	1	0	0
UGC0007469	Clust-UGC0002157	6349	3	1	0	1
UGC0010156	Clust-UGC0002157	7904	5	1	1	1
UGC0007122	Clust-UGC0002157	1516	2	1	0	1
UGC0008593	Clust-UGC0002157	5608	4	1	0	1
UGC0008950	Clust-UGC0002157	1843	1	0	0	0
UGC0005867	Clust-UGC0002157	7482	4	1	0	0
UGC0004803	Clust-UGC0002157	10386	10	1	0	1
UGC0007528	Clust-UGC0002157	6644	7	1	0	1
UGC0002157	Clust-UGC0002157	1660	2	1	0	0
UGC0012685	Clust-UGC0002157	5579	4	1	1	1
UGC0009123	Clust-UGC0002157	6014	3	1	0	1
UGC0006347	Clust-UGC0002157	2294	1	0	0	0
UGC0007545	Clust-UGC0002157	7283	4	1	0	1
UGC0006559	Clust-UGC0002157	2958	1	0	0	0
UGC0002288	Clust-UGC0002157	968	1	0	0	0
UGC0007071	Clust-UGC0002157	3246	4	1	1	0
UGC0007253	Clust-UGC0002157	5600	4	1	0	1
UGC0006282	Clust-UGC0002157	1184	1	0	0	0
UGC0013025	Clust-UGC0002157	4702	2	1	0	1
UGC0007359	Clust-UGC0002157	6512	3	1	0	1
UGC0006928	Clust-UGC0002157	3793	1	0	0	0
UGC0006763	Clust-UGC0002157	153	1	0	0	0
UGC0013276	Clust-UGC0002157	1601	1	0	0	0
UGC0005029	Clust-UGC0002157	8851	5	1	0	1
UGC0009465	Clust-UGC0002157	558	1	0	0	0
UGC0010748	Clust-UGC0002157	3261	5	1	0	1
UGC0009448	Clust-UGC0002157	521	1	0	0	0
UGC0009480	Clust-UGC0002157	2411	2	1	0	0
UGC0007334	Clust-UGC0002157	3531	4	1	0	1
UGC0009051	Clust-UGC0002157	2024	1	0	0	0
UGC0013365	Clust-UGC0002157	5959	6	1	0	1
UGC0007130	Clust-UGC0002157	5693	1	0	0	0
UGC0009605	Clust-UGC0002157	1378	3	1	0	1
UGC0009210	Clust-UGC0002157	5380	4	1	0	1
UGC0007551	Clust-UGC0002157	4907	4	1	0	1
UGC0002185	Clust-UGC0002157	6397	4	1	0	1
UGC0008717	Clust-UGC0002157	1424	1	0	0	0
UGC0010896	Clust-UGC0002157	297	1	0	0	0
UGC0007289	Clust-UGC0002157	5871	3	1	0	1
UGC0007397	Clust-UGC0002157	3641	3	1	0	0
UGC0009379	Clust-UGC0002157	5699	5	1	0	1
UGC0008378	Clust-UGC0002157	163	1	0	0	0
UGC0009338	Clust-UGC0002157	9197	14	1	0	1
UGC0007082	Clust-UGC0002157	1713	3	1	0	0
UGC0006150	Clust-UGC0002157	2411	1	0	0	0
UGC0009413	Clust-UGC0002158	2707	3	1	1	1
UGC0008618	Clust-UGC0002158	2845	2	1	0	1
UGC0006521	Clust-UGC0002158	1047	1	0	0	0
UGC0007264	Clust-UGC0002158	7243	4	1	0	1
UGC0007598	Clust-UGC0002158	3043	1	0	0	0
UGC0010638	Clust-UGC0002158	1391	1	0	0	0
UGC0013179	Clust-UGC0002158	2558	2	1	0	1
UGC0007678	Clust-UGC0002158	4004	1	0	0	0
UGC0005354	Clust-UGC0002158	1306	1	0	0	0
UGC0005355	Clust-UGC0002158	2133	1	0	0	0
UGC0005651	Clust-UGC0002158	5028	1	0	0	0
UGC0007657	Clust-UGC0002158	11183	8	1	0	1
UGC0007658	Clust-UGC0002158	6936	3	1	0	1
UGC0007009	Clust-UGC0002158	7155	2	1	1	0
UGC0012032	Clust-UGC0002158	1716	4	1	2	0
UGC0007028	Clust-UGC0002158	7485	2	1	0	1
UGC0012846	Clust-UGC0002158	3900	4	1	2	0
UGC0004980	Clust-UGC0002158	9104	4	1	0	1
UGC0007189	Clust-UGC0002158	3182	1	0	0	0
UGC0010207	Clust-UGC0002158	428	1	0	0	0
UGC0005386	Clust-UGC0002158	1705	1	0	0	0
UGC0005874	Clust-UGC0002158	4465	2	1	0	0
UGC0004943	Clust-UGC0002158	1498	1	0	0	0
UGC0004947	Clust-UGC0002158	7849	5	1	0	1
UGC0004492	Clust-UGC0002158	6343	2	1	0	1
UGC0004493	Clust-UGC0002158	6220	1	0	0	0
UGC0005692	Clust-UGC0002158	948	1	0	0	0
UGC0007695	Clust-UGC0002158	1221	1	0	0	0
UGC0005668	Clust-UGC0002158	286	1	0	0	0
UGC0003575	Clust-UGC0002158	9339	7	1	0	1
UGC0005719	Clust-UGC0002158	4999	1	0	0	0
UGC0002158	Clust-UGC0002158	2441	2	1	0	0
UGC0006513	Clust-UGC0002158	1781	1	0	0	0
UGC0005123	Clust-UGC0002158	1082	1	0	0	0
UGC0005034	Clust-UGC0002158	6148	4	1	0	1
UGC0005550	Clust-UGC0002158	1040	1	0	0	0
UGC0007772	Clust-UGC0002158	3919	5	1	0	1
UGC0004157	Clust-UGC0002158	3350	2	1	0	0
UGC0006551	Clust-UGC0002158	1365	1	0	0	0
UGC0004828	Clust-UGC0002158	3436	1	0	0	0
UGC0004799	Clust-UGC0002158	3117	2	1	0	1
UGC0004822	Clust-UGC0002158	7505	6	1	0	1
UGC0012624	Clust-UGC0002158	3480	3	1	1	0
UGC0007273	Clust-UGC0002158	6657	3	1	0	1
UGC0007279	Clust-UGC0002158	7846	6	1	0	1
UGC0004112	Clust-UGC0002158	1021	1	0	0	0
UGC0005645	Clust-UGC0002158	1090	1	0	0	0
UGC0005016	Clust-UGC0002158	6943	5	1	0	1
UGC0012839	Clust-UGC0002158	3153	3	1	0	0
UGC0012835	Clust-UGC0002158	4986	4	1	1	0
UGC0005345	Clust-UGC0002158	2492	2	1	0	0
UGC0005660	Clust-UGC0002158	2754	1	0	0	0
UGC0007032	Clust-UGC0002158	4449	1	0	0	0
UGC0005046	Clust-UGC0002158	1746	1	0	0	0
UGC0005592	Clust-UGC0002158	4417	2	1	0	1
UGC0013254	Clust-UGC0002158	476	2	1	1	0
UGC0005628	Clust-UGC0002158	5779	1	0	0	0
UGC0005629	Clust-UGC0002158	1921	1	0	0	0
UGC0012850	Clust-UGC0002158	7532	7	1	0	1
UGC0012222	Clust-UGC0002158	6531	4	1	1	0
UGC0006506	Clust-UGC0002158	1075	1	0	0	0
UGC0004999	Clust-UGC0002158	6407	2	1	0	0
UGC0006597	Clust-UGC0002158	1134	1	0	0	0
UGC0005001	Clust-UGC0002158	7531	7	1	0	1
UGC0005760	Clust-UGC0002158	5741	3	1	0	0
UGC0004950	Clust-UGC0002158	475	1	0	0	0
UGC0005682	Clust-UGC0002158	1268	1	0	0	0
UGC0004562	Clust-UGC0002158	7241	3	1	0	1
UGC0006610	Clust-UGC0002158	1127	1	0	0	0
UGC0007495	Clust-UGC0002158	3168	1	0	0	0
UGC0012245	Clust-UGC0002158	2671	1	0	0	0
UGC0004622	Clust-UGC0002158	4674	1	0	0	0
UGC0005397	Clust-UGC0002158	2511	2	1	0	1
UGC0007740	Clust-UGC0002158	6426	5	1	0	1
UGC0012198	Clust-UGC0002158	3960	3	1	0	1
UGC0010103	Clust-UGC0002158	6026	2	1	0	0
UGC0004149	Clust-UGC0002158	1057	1	0	0	0
UGC0007614	Clust-UGC0002158	3651	2	1	0	1
UGC0006543	Clust-UGC0002158	1050	1	0	0	0
UGC0011199	Clust-UGC0002158	2012	3	1	1	0
UGC0005717	Clust-UGC0002162	5726	6	1	0	1
[truncated: 4,283 more rows]
