# Supplementary material for: Rapid, large-scale species discovery in hyperdiverse taxa using 1D MinION sequencing
Source: BMC Biol. 2019 Nov 29;17:96. doi: 10.1186/s12915-019-0706-9 (PMC6884855; doi:10.1186/s12915-019-0706-9)
Supplement: Supplementary file 5 — Additional file 5. Details on specimens with >3% divergence from Illumina barcodes for final consolidated barcode sets. [file 12915_2019_706_MOESM5_ESM.xlsx]

## Sheet: Additional File 5
Additional File 5: Specimens with >3% divergence from Illumina barcodes for final consolidated barcode sets.
Specimen	Minion full	Minion 313	Illumina 313	Matches to trace sequences in Illumina data (>10x coverage) in the same dataset
UGC0012088	Identical to UGC0011906	Identical to UGC0011906	singleton (>9%)	matches to secondary signal at 99.042% in Illumina (count of 33)
UGC0010204	Identical to UGC0005689	Identical to UGC0005689	Identical to UGC0011195	no match
UGC0012864	Identical to UGC0012864	Identical to UGC0012864	Identical to UGC0009545	no match
UGC0012285	Identical to UGC0008675	Identical to UGC0008675	Identical UGC0012286	no match
UGC0013329	Identical to UGC0013328	Identical to UGC0013328	Identical to UGC0002114	matches to secondary signal at 99.681% in Illumina (count of 452)
UGC0011199	Identical to UGC0008501	Identical to UGC0008501	Identical to UGC0005660	matches to secondary signal at 99.361% in Illumina (count of 15)
UGC0010207	Identical to UGC0005689	Identical to UGC0005689	Identical to UGC0005873	no match
UGC0010179	Identical to UGC0010482	Identical to UGC0010482	Identical to UGC0010485	no match
UGC0007496	Identical to UGC0012958	Identical to UGC0012958	Identical to UGC0006750	matches to secondary signal at 99.681% in Illumina (count of 59)
UGC0013325	Identical to UGC0002270	Identical to UGC0002270	Identical to UGC0005703	matches to secondary signal at 99.681% in Illumina (count of 44)
UGC0010274	Identical to UGC0007271	Identical to UGC0007271	Identical to UGC0009165	matches to secondary signal at 99.681% in Illumina (count of 558)
UGC0011155	Identical to UGC0007243	Identical to UGC0007243	Identical to UGC0006386	matches to secondary signal at 99.361% in Illumina (count of 66)
UGC0003372	singleton (>9%)	singleton (>9%)	singleton to 7.4%	no match
UGC0006133	Identical to UGC0006068	Identical to UGC0006068	Identical to UGC0008527	matches to secondary signal at 99.042% in Illumina (count of 15)
UGC0010126	<0.5% away from UGC003004	<0.3 % away from UGC003004	Identical to UGC0008527	matches to secondary signal at 99.042% in Illumina (count of 42)
UGC0003004	Identical to UGC0008527	Identical to UGC0008527	Identical to UGC0008527	no match
UGC0008527	Identical to UGC0003004	Identical to UGC0003004	Identical to UGC0003004	no match
UGC0006068	Identical to UGC0006133	Identical to UGC0006133	Identical to UGC0012290	no match
UGC0004742	In 0.6% cluster with UGC0012371	In 0.6% cluster with UGC0012371	In 0.3% cluster with UGC0005091	no match
UGC0010485	Singleton (3.4%)	Singleton (3.4%)	Idencal to UGC0010485	matches to secondary signal at 99.681% in Illumina (count of 252)
UGC0012855	Identical to UGC0012835	Identical to UGC0012835	Identical to UGC0006355	matches to secondary signal at 99.042% in Illumina (count of 82)
UGC0012846	Identical to UGC0012855	Identical to UGC0012855	Identical to UGC0012245	matches to secondary signal at 99.681% in Illumina (count of 37)
UGC0012835	Identical to UGC0012855	Identical to UGC0012855	Identical to UGC0012245	matches to secondary signal at 99.681% in Illumina (count of 73)
UGC0012624	Identical to UGC0012855	Identical to UGC0012855	Identical to UGC0012245	matches to secondary signal at 99.681% in Illumina (count of 24)
UGC0013225	Identical to UGC0012368	Identical to UGC0012368	Identical to UGC0004621	matches to secondary signal at 100% in Illumina (count of 43)
